# Supplementary material for: Timing and ecological priority shaped the diversification of sedges in the Himalayas
Source: PeerJ journal article supplement (doi:10.7717/peerj.6792), 2019-06-07
Supplement: Figure_S1.pdf [file Figure_S1.pdf]

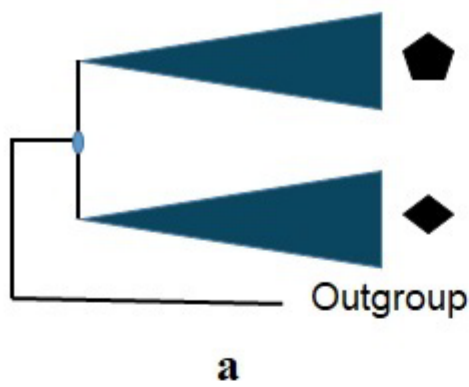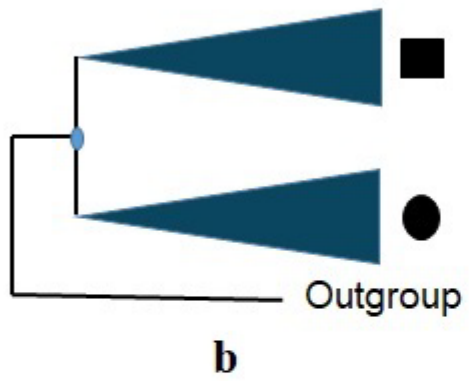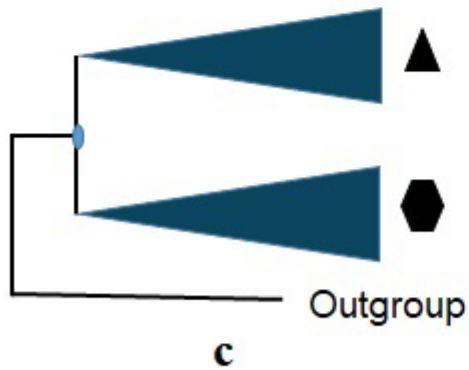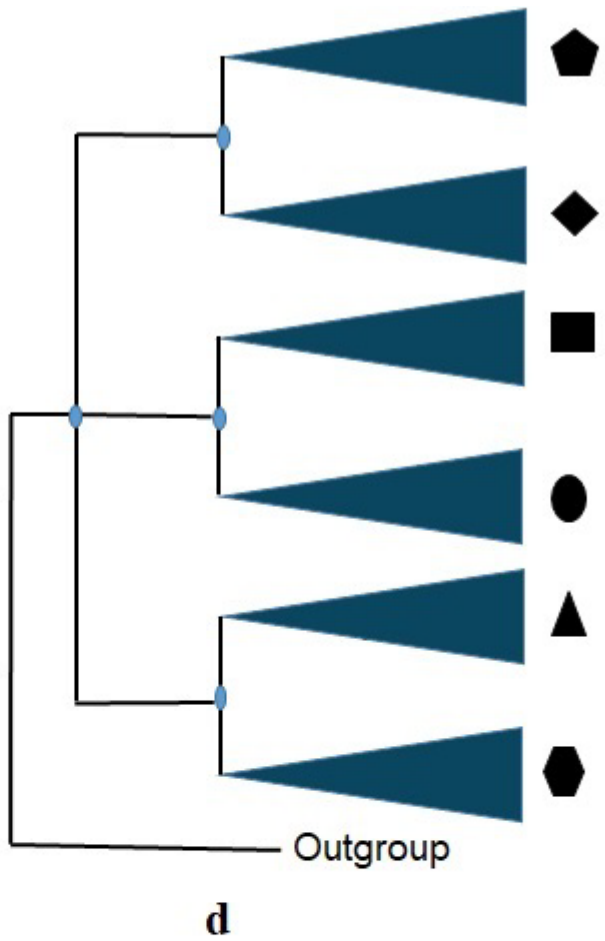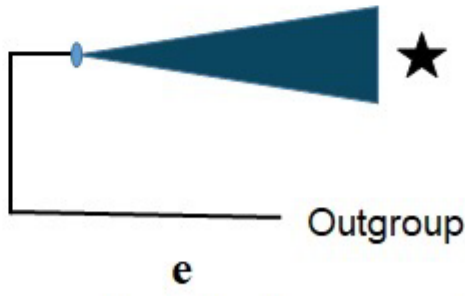

- Himalayan species in Core *Carex* clade
- Non-Himalayan species in *Vignea* clade
- Non-Himalayan species in Core *Carex* clade
- Himalayan species in *Vignea* clade
- Himalayan species in core *Unispicate* clade
- All species in *Kobresia* clade
- Non-Himalayan species in core *Unispicate* clade
