# Supplementary material for: Timing and ecological priority shaped the diversification of sedges in the Himalayas
Source: PeerJ journal article supplement (doi:10.7717/peerj.6792), 2019-06-07

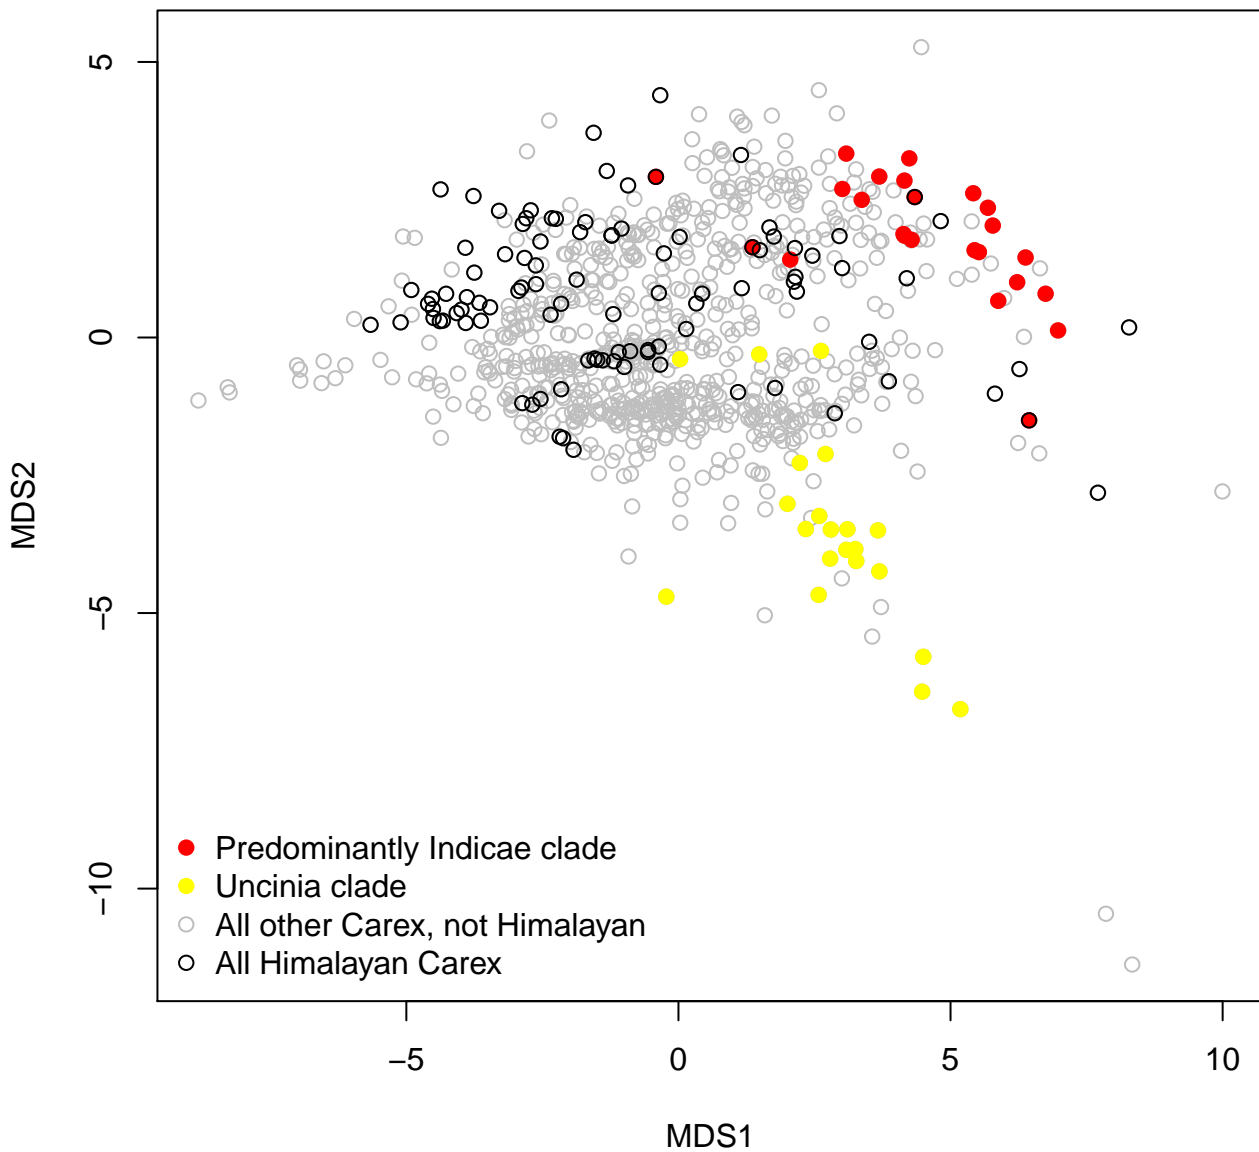

Supplement: Figure_S5.pdf [file Figure_S5.pdf]
