# Supplementary material for: Timing and ecological priority shaped the diversification of sedges in the Himalayas
Source: PeerJ. 2019 Jun 7;7:e6792. doi: 10.7717/peerj.6792 (PMC6557248; doi:10.7717/peerj.6792)
Supplement: Table S2 — All the species included in the study with original taxa labelling as available on dryad dataset (http://dx.doi.org/10.5061/dryad.k05qb), while new sequences labelled as species name —region (three-letter TDWG geographical code) —herbarium voucher number. [file peerj-07-6792-s008.docx]

**Table S2 The presence of species in Himalayan, non-Himalayan and both regions and binary coding for narrow and broad sense analyses are mentioned.** All the species included in the study with original taxa labelling as available on dryad dataset (<http://dx.doi.org/10.5061/dryad.k05qb>), while new sequences labelled as species name | region (three-letter TDWG geographical code) | herbarium voucher number.

| **Original labelling of Taxa** | **Regions** | **Narrow Sense** | | **Broad Sense** | | |
| --- | --- | --- | --- | --- | --- | --- |
|  |  | **H** | **N** | | **H** | **N** | |
| *Carex aboriginum|STARR|B1231|IDA|spm00001838* | Non-Himalayan | 0 | 1 | | 0 | 1 | |
| *Carex abrupta|STARR|B520|BRC|spm00001126* | Non-Himalayan | 0 | 1 | | 0 | 1 | |
| *Carex abscondita|STARR|B057|MRY|spm00000676* | Non-Himalayan | 0 | 1 | | 0 | 1 | |
| *Carex acaulis|LUCENO|NA|CLS|spm00000518* | Non-Himalayan | 0 | 1 | | 0 | 1 | |
| *Carex accrescens|HIPP|NA|KOR|spm00000018* | Non-Himalayan | 0 | 1 | | 0 | 1 | |
| *Carex acicularis|STARR_FORD|STA_85|NZ?|spm00005161* | Non-Himalayan | 0 | 1 | | 0 | 1 | |
| *Carex acidicola|STARR|B039|ALA|spm00000658* | Non-Himalayan | 0 | 1 | | 0 | 1 | |
| *Carex acuta|LUCENO||Italy|spm00003084* | Non-Himalayan | 0 | 1 | | 0 | 1 | |
| *Carex acutiformis|STARR|B1516|TVL|spm00002122* | Both | 1 | 1 | | 1 | 1 | |
| *Carex adelostoma|STARR|B1012|ARK|spm00001619* | Non-Himalayan | 0 | 1 | | 0 | 1 | |
| *Carex adusta|STARR|B1466|ABT|spm00002072* | Non-Himalayan | 0 | 1 | | 0 | 1 | |
| *Carex aematorrhyncha|LUCENO|NA|CLS|spm00000532* | Non-Himalayan | 0 | 1 | | 0 | 1 | |
| *Carex aequialta|SANGTAE|E0001|KOR?|spm00000320* | Non-Himalayan | 0 | 1 | | 0 | 1 | |
| *Carex aestivalis|STARR|B062|PEN|spm00000681* | Non-Himalayan | 0 | 1 | | 0 | 1 | |
| *Carex aethiopica|JIMENEZMEJIAS||CPP|spm00004365* | Non-Himalayan | 0 | 1 | | 0 | 1 | |
| *Carex aggregata|STARR|B066|KTY|spm00000685* | Non-Himalayan | 0 | 1 | | 0 | 1 | |
| *Carex agrostoides|REZNICEK|NA|MXE|spm00000263* | Non-Himalayan | 0 | 1 | | 0 | 1 | |
| *Carex alajica|JIMENEZMEJIAS||CHX|spm00003353* | Non-Himalayan | 0 | 1 | | 0 | 1 | |
| *Carex alata|STARR|B068|ALA|spm00000687* | Non-Himalayan | 0 | 1 | | 0 | 1 | |
| *Carex alatauensis|JIMENEZMEJIAS||AFG|spm00003401* | Both | 1 | 1 | | 1 | 1 | |
| *Carex alba|LUCENO|NA|SPA|spm00000584* | Non-Himalayan | 0 | 1 | | 0 | 1 | |
| *Carex albata|STARR_FORD|STA_773|JAP|spm00005254* | Non-Himalayan | 0 | 1 | | 0 | 1 | |
| *Carex albicans|STARR_FORD|STA_187|ARK|spm00005157* | Non-Himalayan | 0 | 1 | | 0 | 1 | |
| *Carex albida|JIMENEZMEJIAS||CAL|spm00003602* | Non-Himalayan | 0 | 1 | | 0 | 1 | |
| *Carex albolutescens|STARR|B075|OKL|spm00000694* | Non-Himalayan | 0 | 1 | | 0 | 1 | |
| *Carex albonigra|STARR|B1014|ARK|spm00001621* | Non-Himalayan | 0 | 1 | | 0 | 1 | |
| *Carex albursina|STARR|B780|KTY|spm00001384* | Non-Himalayan | 0 | 1 | | 0 | 1 | |
| *Carex allanii|K_FORD|NA|NZS|spm00002185* | Non-Himalayan | 0 | 1 | | 0 | 1 | |
| *Carex alma|STARR|B085|CAL|spm00000703* | Non-Himalayan | 0 | 1 | | 0 | 1 | |
| *Carex alopecuroides|SANGTAE|D0055|KOR?|spm00000321* | Both | 1 | 1 | | 1 | 1 | |
| *Carex alta|HIPP|alta_0436063|CH?|spm00002237* | Both | 1 | 1 | | 1 | 1 | |
| *Carex amphibola|STARR|B035|ALA|spm00000654* | Non-Himalayan | 0 | 1 | | 0 | 1 | |
| *Carex amplifolia|STARR|B097|NEV|spm00000715* | Non-Himalayan | 0 | 1 | | 0 | 1 | |
| *Carex andersonii|LUCENO|NA|AGS|spm00000522* | Non-Himalayan | 0 | 1 | | 0 | 1 | |
| *Carex andina|LUCENO|NA|CLC|spm00000527* | Non-Himalayan | 0 | 1 | | 0 | 1 | |
| *Carex andringitrensis|GEHRKE|NA|MDG|spm00000169* | Non-Himalayan | 0 | 1 | | 0 | 1 | |
| *Carex angolensis|GEHRKE|NA|MLW|spm00000170* | Non-Himalayan | 0 | 1 | | 0 | 1 | |
| *Carex angustata|STARR|B095|CAL|spm00000713* | Non-Himalayan | 0 | 1 | | 0 | 1 | |
| *Carex angustilepis|REZNICEK|NA|MXE|spm00000356* | Non-Himalayan | 0 | 1 | | 0 | 1 | |
| *Carex angustispica|REZNICEK|NA|MXS|spm00000262* | Non-Himalayan | 0 | 1 | | 0 | 1 | |
| *Carex anisostachys|REZNICEK|NA|MXT|spm00000258* | Non-Himalayan | 0 | 1 | | 0 | 1 | |
| *Carex annectens|STARR|B112|ALA|spm00000730* | Non-Himalayan | 0 | 1 | | 0 | 1 | |
| *Carex anthoxanthea|STARR|B961|WAS|spm00001568* | Non-Himalayan | 0 | 1 | | 0 | 1 | |
| *Carex antoniensis|MESTERHAZY|NA|CVI|spm00002181* | Non-Himalayan | 0 | 1 | | 0 | 1 | |
| *Carex aperta|STARR|B1235|BRC|spm00001842* | Non-Himalayan | 0 | 1 | | 0 | 1 | |
| *Carex aphylla|LUCENO|NA|AGS|spm00000526* | Non-Himalayan | 0 | 1 | | 0 | 1 | |
| *Carex appalachica|STARR|B103|MAS|spm00000721* | Non-Himalayan | 0 | 1 | | 0 | 1 | |
| *Carex appendiculata|LUCENO||Russia|spm00003267* | Non-Himalayan | 0 | 1 | | 0 | 1 | |
| *Carex appressa|HIPP|NA|NSW|spm00002189* | Non-Himalayan | 0 | 1 | | 0 | 1 | |
| *Carex appropinquata|HIPP|appropinquata_3358|GER|spm00002248* | Non-Himalayan | 0 | 1 | | 0 | 1 | |
| *Carex aquatilis|STARR_FORD||QUE|spm00005232* | Non-Himalayan | 0 | 1 | | 0 | 1 | |
| *Carex arapahoensis|STARR|B1118|COL|spm00001725* | Non-Himalayan | 0 | 1 | | 0 | 1 | |
| *Carex arcta|STARR|B092|ASK|spm00000710* | Non-Himalayan | 0 | 1 | | 0 | 1 | |
| *Carex arctata|STARR|B113|WIS|spm00000731* | Non-Himalayan | 0 | 1 | | 0 | 1 | |
| *Carex arctiformis|STARR|B1244|BRC|spm00001851* | Non-Himalayan | 0 | 1 | | 0 | 1 | |
| *Carex arenaria|STARR|B115|DEL|spm00000733* | Non-Himalayan | 0 | 1 | | 0 | 1 | |
| *Carex argyrantha|STARR|B116|MRY|spm00000734* | Non-Himalayan | 0 | 1 | | 0 | 1 | |
| *Carex arkansana|STARR|B119|ILL|spm00000737* | Non-Himalayan | 0 | 1 | | 0 | 1 | |
| *Carex arnellii|LUCENO|3E4MMR13|SWE|spm00003783* | Non-Himalayan | 0 | 1 | | 0 | 1 | |
| *Carex assiniboinensis|STARR|B104|MAN|spm00000722* | Non-Himalayan | 0 | 1 | | 0 | 1 | |
| *Carex astricta|JIMENEZMEJIAS|||spm00004420* | Non-Himalayan | 0 | 1 | | 0 | 1 | |
| *Carex asturica|JIMENEZMEJIAS||SPA|spm00004385* | Non-Himalayan | 0 | 1 | | 0 | 1 | |
| *Carex asynchrona|REZNICEK|NA|MXE|spm00000257* | Non-Himalayan | 0 | 1 | | 0 | 1 | |
| *Carex atherodes|STARR|B1242|BRC|spm00001849* | Non-Himalayan | 0 | 1 | | 0 | 1 | |
| *Carex athrostachya|STARR|B109|CAL|spm00000727* | Non-Himalayan | 0 | 1 | | 0 | 1 | |
| *Carex atlantica|STARR_FORD||PEN|spm00005432* | Non-Himalayan | 0 | 1 | | 0 | 1 | |
| *Carex atractodes|REZNICEK|NA|MXE|spm00000256* | Non-Himalayan | 0 | 1 | | 0 | 1 | |
| *Carex atrata|MESTERHAZY|NA|AUT|spm00002172* | Both | 1 | 1 | | 1 | 1 | |
| *Carex atratiformis|STARR|B1144|ABT|spm00001751* | Non-Himalayan | 0 | 1 | | 0 | 1 | |
| *Carex atrofusca|PAK|183078* | Both | 1 | 1 | | 1 | 1 | |
| *Carex atropicta|LUCENO|NA|AGS|spm00000519* | Non-Himalayan | 0 | 1 | | 0 | 1 | |
| *Carex atrosquama|STARR|B1113|MNT|spm00001720* | Non-Himalayan | 0 | 1 | | 0 | 1 | |
| *Carex aucklandica|JIMENEZMEJIAS|||spm00004410* | Non-Himalayan | 0 | 1 | | 0 | 1 | |
| *Carex augustinowiczii|SANGTAE|D0521|KOR?|spm00000322* | Non-Himalayan | 0 | 1 | | 0 | 1 | |
| *Carex aurea|STARR|B149||spm00000767* | Non-Himalayan | 0 | 1 | | 0 | 1 | |
| *Carex aureolensis|STARR|B152|MSI|spm00000770* | Non-Himalayan | 0 | 1 | | 0 | 1 | |
| *Carex auriculata|SANGTAE|D0527|KOR?|spm00000345* | Non-Himalayan | 0 | 1 | | 0 | 1 | |
| *Carex austrina|STARR|B172|MRY|spm00000790* | Non-Himalayan | 0 | 1 | | 0 | 1 | |
| *Carex austroalpina|LUCENO|NA|SPA|spm00000535* | Non-Himalayan | 0 | 1 | | 0 | 1 | |
| *Carex austrocaroliniana|STARR|B1122|NCA|spm00001729* | Non-Himalayan | 0 | 1 | | 0 | 1 | |
| *Carex austrocompacta|STARR_FORD|STA_4|TAS|spm00005217* | Non-Himalayan | 0 | 1 | | 0 | 1 | |
| *Carex austroflaccida|STARR_FORD|STA_21||spm00005091* | Non-Himalayan | 0 | 1 | | 0 | 1 | |
| *Carex austromexicana|REZNICEK|NA|MXS|spm00000358* | Non-Himalayan | 0 | 1 | | 0 | 1 | |
| *Carex aztecica|REZNICEK|NA|MXS|spm00000254* | Non-Himalayan | 0 | 1 | | 0 | 1 | |
| *Carex azuayae|JIMENEZMEJIAS|NA|VEN|spm00000593* | Non-Himalayan | 0 | 1 | | 0 | 1 | |
| *Carex baccans|STARR_FORD|STA_208|TAI|spm00005149* | Both | 1 | 1 | | 1 | 1 | |
| *Carex backii|STARR|B1400|BRC|spm00002007* | Non-Himalayan | 0 | 1 | | 0 | 1 | |
| *Carex baileyi|STARR|B133|KTY|spm00000751* | Non-Himalayan | 0 | 1 | | 0 | 1 | |
| *Carex baimaensis|XIAOFENG|NA|CHS|spm00000027* | Non-Himalayan | 0 | 1 | | 0 | 1 | |
| *Carex baldensis|STARR_FORD||SWI|spm00005242* | Non-Himalayan | 0 | 1 | | 0 | 1 | |
| *Carex balfourii|LUCENO|NA|REU|spm00000528* | Non-Himalayan | 0 | 1 | | 0 | 1 | |
| *Carex baltzellii|STARR|B1307|FLA|spm00001914* | Non-Himalayan | 0 | 1 | | 0 | 1 | |
| *Carex banksiana|STARR_FORD|STA_68|NZ?|spm00005085* | Non-Himalayan | 0 | 1 | | 0 | 1 | |
| *Carex banksii|LUCENO|NA|CLS|spm00000545* | Non-Himalayan | 0 | 1 | | 0 | 1 | |
| *Carex barbarae|STARR|B846|CAL|spm00001449* | Non-Himalayan | 0 | 1 | | 0 | 1 | |
| *Carex barrattii|STARR|B130|ALA|spm00000748* | Non-Himalayan | 0 | 1 | | 0 | 1 | |
| *Carex basiantha|STARR|B017|SCA|spm00000637* | Non-Himalayan | 0 | 1 | | 0 | 1 | |
| *Carex basutorum|GEHRKE|NA|NAT|spm00000146* | Non-Himalayan | 0 | 1 | | 0 | 1 | |
| *Carex bathiei|HIPP|NA|MDG|spm00002195* | Non-Himalayan | 0 | 1 | | 0 | 1 | |
| *Carex bebbii|STARR|B127|MAN|spm00000745* | Non-Himalayan | 0 | 1 | | 0 | 1 | |
| *Carex bella|STARR|B1114|COL|spm00001721* | Non-Himalayan | 0 | 1 | | 0 | 1 | |
| *Carex bequaertii|GEHRKE|NA|KEN|spm00000176* | Non-Himalayan | 0 | 1 | | 0 | 1 | |
| *Carex bhutanensis|JIMENEZMEJIAS||CHT|spm00003407* | Both | 1 | 1 | | 1 | 0 | |
| *Carex bicknellii|STARR|B126|INI|spm00000744* | Non-Himalayan | 0 | 1 | | 0 | 1 | |
| *Carex bicolor|STARR|B1015|ARK|spm00001622* | Non-Himalayan | 0 | 1 | | 0 | 1 | |
| *Carex bigelowii|LUCENO|||spm00003230* | Both | 1 | 1 | | 1 | 1 | |
| *Carex bijiangensis|JIMENEZMEJIAS||CHT|spm00003354* | Non-Himalayan | 0 | 1 | | 1 | 0 | |
| *Carex biltmoreana|STARR|B1462|NCA|spm00002068* | Non-Himalayan | 0 | 1 | | 0 | 1 | |
| *Carex binervis|JIMENEZMEJIAS||FRA|spm00004357* | Non-Himalayan | 0 | 1 | | 0 | 1 | |
| *Carex bistaminata|JIMENEZMEJIAS||CHT|spm00003405* | Non-Himalayan | 0 | 1 | | 1 | 1 | |
| *Carex blakei|JIMENEZMEJIAS||NSW|spm00004358* | Non-Himalayan | 0 | 1 | | 0 | 1 | |
| *Carex blanda|STARR|B1212|TEN|spm00001819* | Non-Himalayan | 0 | 1 | | 0 | 1 | |
| *Carex blepharicarpa|HIPP|NA|KOR|spm00000012* | Non-Himalayan | 0 | 1 | | 0 | 1 | |
| *Carex bohemica|HIPP|bohemica_8650|FIN|spm00002276* | Non-Himalayan | 0 | 1 | | 0 | 1 | |
| *Carex bolanderi|STARR|B811|CAL|spm00001414* | Non-Himalayan | 0 | 1 | | 0 | 1 | |
| *Carex boliviensis|REZNICEK|NA|MXC|spm00000255* | Non-Himalayan | 0 | 1 | | 0 | 1 | |
| *Carex bonanzensis|STARR|B1213|ARK|spm00001820* | Non-Himalayan | 0 | 1 | | 0 | 1 | |
| *Carex bonariensis|STARR_FORD|STA_783|BOL|spm00005361* | Non-Himalayan | 0 | 1 | | 0 | 1 | |
| *Carex borbonica|JIMENEZMEJIAS||REU|spm00004353* | Non-Himalayan | 0 | 1 | | 0 | 1 | |
| *Carex borealipolaris|STARR|B1224|MNT|spm00001831* | Non-Himalayan | 0 | 1 | | 0 | 1 | |
| *Carex borii|JIMENEZMEJIAS||WHM|spm00003355* | Both | 1 | 1 | | 1 | 0 | |
| *Carex boryana|JIMENEZMEJIAS||REU|spm00004377* | Non-Himalayan | 0 | 1 | | 0 | 1 | |
| *Carex bostrychostigma|LUCENO|4E4MMR13|JAP|spm00003784* | Non-Himalayan | 0 | 1 | | 0 | 1 | |
| *Carex brachycalama|REZNICEK|NA|BOL|spm00000368* | Non-Himalayan | 0 | 1 | | 0 | 1 | |
| *Carex brainerdii|STARR|B142|CAL|spm00000760* | Non-Himalayan | 0 | 1 | | 0 | 1 | |
| *Carex brasiliensis|REZNICEK|NA|BZS|spm00000366* | Non-Himalayan | 0 | 1 | | 0 | 1 | |
| *Carex breedlovei|REZNICEK|NA|MXT|spm00000249* | Non-Himalayan | 0 | 1 | | 0 | 1 | |
| *Carex breviaristata|XIAOFENG|NA|CHS|spm00000029* | Non-Himalayan | 0 | 1 | | 0 | 1 | |
| *Carex brevicaulis|STARR_FORD|STA_249|TDC|spm00005216* | Non-Himalayan | 0 | 1 | | 0 | 1 | |
| *Carex brevicollis|JIMENEZMEJIAS|NA|TCS|spm00003478* | Non-Himalayan | 0 | 1 | | 0 | 1 | |
| *Carex brevior|STARR|B1216|BRC|spm00001823* | Non-Himalayan | 0 | 1 | | 0 | 1 | |
| *Carex breviprophylla|EHM|E00184752* | Both | 1 | 1 | | 1 | 0 | |
| *Carex breweri|STARR|B969|WAS|spm00001576* | Non-Himalayan | 0 | 1 | | 0 | 1 | |
| *Carex brizoides|STARR_FORD|STA_784|GER|spm00005239* | Non-Himalayan | 0 | 1 | | 0 | 1 | |
| *Carex bromoides|HIPP|bromoides_3157|WIS|spm00002284* | Non-Himalayan | 0 | 1 | | 0 | 1 | |
| *Carex brunnea|PAK|183093* | Both | 1 | 1 | | 1 | 1 | |
| *Carex brunnescens|WATERWAY|||spm00005976* | Non-Himalayan | 0 | 1 | | 0 | 1 | |
| *Carex brysonii|STARR|B036|ALA|spm00000655* | Non-Himalayan | 0 | 1 | | 0 | 1 | |
| *Carex buekii|JIMENEZMEJIAS|NA|CZE|spm00000558* | Non-Himalayan | 0 | 1 | | 0 | 1 | |
| *Carex bulbostylis|STARR|B029|MSI|spm00000648* | Non-Himalayan | 0 | 1 | | 0 | 1 | |
| *Carex bulgarica|LUCENO|NA|BUL|spm00000555* | Non-Himalayan | 0 | 1 | | 0 | 1 | |
| *Carex bullata|STARR|B157|MAS|spm00000775* | Non-Himalayan | 0 | 1 | | 0 | 1 | |
| *Carex burchelliana|JIMENEZMEJIAS||CPP|spm00004368* | Non-Himalayan | 0 | 1 | | 0 | 1 | |
| *Carex bushii|STARR|B159|DEL|spm00000777* | Non-Himalayan | 0 | 1 | | 0 | 1 | |
| *Carex buxbaumii|STARR|B147|ASK|spm00000765* | Non-Himalayan | 0 | 1 | | 0 | 1 | |
| *Carex calcifugens|STARR|B049|FLA|spm00000668* | Non-Himalayan | 0 | 1 | | 0 | 1 | |
| *Carex calcis|K_FORD|NA|NZS|spm00002186* | Non-Himalayan | 0 | 1 | | 0 | 1 | |
| *Carex californica|STARR|B1078|CAL|spm00001685* | Non-Himalayan | 0 | 1 | | 0 | 1 | |
| *Carex caligena|REZNICEK|NA|MXE|spm00000264* | Non-Himalayan | 0 | 1 | | 0 | 1 | |
| *Carex camposii|JIMENEZMEJIAS||SPA|spm00004363* | Non-Himalayan | 0 | 1 | | 0 | 1 | |
| *Carex camptoglochin|LUCENO|NA|CLS|spm00000589* | Non-Himalayan | 0 | 1 | | 0 | 1 | |
| *Carex canariensis|HIPP|canariensis_83917|SPA|spm00002291* | Non-Himalayan | 0 | 1 | | 0 | 1 | |
| *Carex candolleana|SANGTAE|E0109|KOR?|spm00000327* | Both | 1 | 1 | | 1 | 1 | |
| *Carex canescens|PAK|183104* | Both | 1 | 1 | | 1 | 1 | |
| *Carex capensis|STARR_FORD|STA_74||spm00005202* | Non-Himalayan | 0 | 1 | | 0 | 1 | |
| *Carex capillaris|STARR|B1488|NWT|spm00002094* | Both | 1 | 1 | | 1 | 1 | |
| *Carex capillifolia|STARR_FORD|||spm00005195* | Both | 1 | 1 | | 1 | 1 | |
| *Carex capitata|STARR|B1429|KRA|spm00002036* | Non-Himalayan | 0 | 1 | | 0 | 1 | |
| *Carex capitellata|JIMENEZMEJIAS|NA|TUR|spm00003459* | Non-Himalayan | 0 | 1 | | 0 | 1 | |
| *Carex cardiolepis|PAK|183054* | Both | 1 | 1 | | 1 | 0 | |
| *Carex careyana|STARR|B798|KTY|spm00001401* | Non-Himalayan | 0 | 1 | | 0 | 1 | |
| *Carex caroliniana|STARR|B197|ALA|spm00000815* | Non-Himalayan | 0 | 1 | | 0 | 1 | |
| *Carex caryophyllea|STARR|B1457|SPA|spm00002063* | Non-Himalayan | 0 | 1 | | 0 | 1 | |
| *Carex castanea|STARR|B876|NFL|spm00001479* | Non-Himalayan | 0 | 1 | | 0 | 1 | |
| *Carex castroviejoi|*Carex_WSU_55*|*FASTA.LABEL.NO.SPECIMEN.MATCH | Non-Himalayan | 0 | 1 | | 0 | 1 | |
| *Carex catharinensis|JIMENEZMEJIAS||BZS|spm00004375* | Non-Himalayan | 0 | 1 | | 0 | 1 | |
| *Carex caucasica|JIMENEZMEJIAS||IRN|spm00003593* | Non-Himalayan | 0 | 1 | | 0 | 1 | |
| *Carex caudata|LUCENO|NA|CAL|spm00000529* | Non-Himalayan | 0 | 1 | | 0 | 1 | |
| *Carex cephaloidea|STARR|B186|MAI|spm00000804* | Non-Himalayan | 0 | 1 | | 0 | 1 | |
| *Carex cephalophora|STARR|B210|MRY|spm00000828* | Non-Himalayan | 0 | 1 | | 0 | 1 | |
| *Carex cercostachys|JIMENEZMEJIAS||CHC|spm00003397* | Both | 1 | 1 | | 1 | 0 | |
| *Carex chalciolepis|STARR|B175|TAI|spm00000793* | Non-Himalayan | 0 | 1 | | 0 | 1 | |
| *Carex chaofangii|XIAOFENG|NA|CHS|spm00000093* | Non-Himalayan | 0 | 1 | | 0 | 1 | |
| *Carex chapmanii|STARR|B214|FLA|spm00000832* | Non-Himalayan | 0 | 1 | | 0 | 1 | |
| *Carex cherokeensis|STARR|B212|FLA|spm00000830* | Non-Himalayan | 0 | 1 | | 0 | 1 | |
| *Carex chiapensis|REZNICEK|NA|MXS|spm00000267* | Non-Himalayan | 0 | 1 | | 0 | 1 | |
| *Carex chihuahuensis|STARR|B1205|ARI|spm00001812* | Non-Himalayan | 0 | 1 | | 0 | 1 | |
| *Carex chlorosaccus|GEHRKE|NA|KEN|spm00000180* | Non-Himalayan | 0 | 1 | | 0 | 1 | |
| *Carex chordalis|REZNICEK|NA|MXC|spm00000251* | Non-Himalayan | 0 | 1 | | 0 | 1 | |
| *Carex chordorrhiza|STARR|B1318|BRC|spm00001925* | Non-Himalayan | 0 | 1 | | 0 | 1 | |
| *Carex chungii|XIAOFENG|NA|CHS|spm00000022* | Non-Himalayan | 0 | 1 | | 0 | 1 | |
| *Carex circinata|STARR|B1370|ARK|spm00001977* | Non-Himalayan | 0 | 1 | | 0 | 1 | |
| *Carex clavata|JIMENEZMEJIAS||CPP|spm00004348* | Non-Himalayan | 0 | 1 | | 0 | 1 | |
| *Carex cognata|GEHRKE|NA|NAT|spm00000182* | Non-Himalayan | 0 | 1 | | 0 | 1 | |
| *Carex colchica|MESTERHAZY|NA|UKR|spm00002173* | Non-Himalayan | 0 | 1 | | 0 | 1 | |
| *Carex collinsii|STARR|B209|DEL|spm00000827* | Non-Himalayan | 0 | 1 | | 0 | 1 | |
| *Carex collumanthus|STARR_FORD|STA_11|COL|spm00005156* | Non-Himalayan | 0 | 1 | | 0 | 1 | |
| *Carex comosa|STARR|B208|CAL|spm00000826* | Non-Himalayan | 0 | 1 | | 0 | 1 | |
| *Carex complanata|STARR|B164|TEX|spm00000782* | Non-Himalayan | 0 | 1 | | 0 | 1 | |
| *Carex complexa|REZNICEK|NA|MXE|spm00000357* | Non-Himalayan | 0 | 1 | | 0 | 1 | |
| *Carex composita|JIMENEZMEJIAS||CHT|spm00003356* | Both | 1 | 1 | | 1 | 1 | |
| *Carex concinnoides|STARR|B1311|CAL|spm00001918* | Non-Himalayan | 0 | 1 | | 0 | 1 | |
| *Carex conferta|GEHRKE|NA|ETH|spm00000184* | Non-Himalayan | 0 | 1 | | 0 | 1 | |
| *Carex congdonii|STARR|B1079|CAL|spm00001686* | Non-Himalayan | 0 | 1 | | 0 | 1 | |
| *Carex congolensis|GEHRKE|NA|MLW|spm00000181* | Non-Himalayan | 0 | 1 | | 0 | 1 | |
| *Carex coninux|SHUREN|K_pusilla_ZSL||spm00003655* | Both | 1 | 1 | | 1 | 1 | |
| *Carex conjuncta|STARR|B166|DEL|spm00000784* | Non-Himalayan | 0 | 1 | | 0 | 1 | |
| *Carex conoidea|STARR|B825|DEL|spm00001428* | Non-Himalayan | 0 | 1 | | 0 | 1 | |
| *Carex cordillerana|STARR|B943|BRC|spm00001544* | Non-Himalayan | 0 | 1 | | 0 | 1 | |
| *Carex corrugata|STARR|B051|ALA|spm00000670* | Non-Himalayan | 0 | 1 | | 0 | 1 | |
| *Carex corynoidea|STARR_FORD|STA_139|NZ?|spm00005087* | Non-Himalayan | 0 | 1 | | 0 | 1 | |
| *Carex coulteri|REZNICEK|NA|MXC|spm00000268* | Non-Himalayan | 0 | 1 | | 0 | 1 | |
| *Carex crawei|STARR|B868|NFL|spm00001471* | Non-Himalayan | 0 | 1 | | 0 | 1 | |
| *Carex crawfordii|HIPP|NA|ILL|spm00002161* | Non-Himalayan | 0 | 1 | | 0 | 1 | |
| *Carex crebra|JIMENEZMEJIAS||CHT|spm00003392* | Non-Himalayan | 0 | 1 | | 1 | 1 | |
| *Carex crebriflora|STARR|B425||spm00001043* | Non-Himalayan | 0 | 1 | | 0 | 1 | |
| *Carex cretica|JIMENEZMEJIAS||KRI|spm00004382* | Non-Himalayan | 0 | 1 | | 0 | 1 | |
| *Carex crinalis|JIMENEZMEJIAS|NA|ECU|spm00000602* | Non-Himalayan | 0 | 1 | | 0 | 1 | |
| *Carex crinita|STARR_FORD||QUE|spm00005233* | Non-Himalayan | 0 | 1 | | 0 | 1 | |
| *Carex crispa|JIMENEZMEJIAS|||spm00004422* | Non-Himalayan | 0 | 1 | | 0 | 1 | |
| *Carex cristatella|STARR|B182|KTY|spm00000800* | Non-Himalayan | 0 | 1 | | 0 | 1 | |
| *Carex cruenta|JIMENEZMEJIAS||EHM|spm00003357* | Both | 1 | 1 | | 1 | 0 | |
| *Carex cruscorvi|STARR|B204|FLA|spm00000822* | Non-Himalayan | 0 | 1 | | 0 | 1 | |
| *Carex cryptolepis|STARR|B1123|ILL|spm00001730* | Non-Himalayan | 0 | 1 | | 0 | 1 | |
| *Carex cumberlandensis|STARR|B199|ARK|spm00000817* | Non-Himalayan | 0 | 1 | | 0 | 1 | |
| *Carex cumulata|STARR|B253|ILL|spm00000871* | Non-Himalayan | 0 | 1 | | 0 | 1 | |
| *Carex curaica|HIPP|curaica_sn|TVA|spm00002340* | Both | 1 | 1 | | 1 | 1 | |
| *Carex curatorum|STARR|B1409||spm00002016* | Non-Himalayan | 0 | 1 | | 0 | 1 | |
| *Carex curticeps|STARR_FORD|STA_2|EHM|spm00005191* | Both | 1 | 1 | | 1 | 0 | |
| *Carex curvula|STARR_FORD|STA_100|FRA|spm00005184* | Non-Himalayan | 0 | 1 | | 0 | 1 | |
| *Carex cusickii|STARR|B1397|BRC|spm00002004* | Non-Himalayan | 0 | 1 | | 0 | 1 | |
| *Carex cyanea|STARR_FORD|STA_56|NZ?|spm00005097* | Non-Himalayan | 0 | 1 | | 0 | 1 | |
| *Carex dacica|LUCENO||Iceland|spm00003155* | Non-Himalayan | 0 | 1 | | 0 | 1 | |
| *Carex daltonii|EHM|E00047630* | Himalayan | 1 | 0 | | 1 | 0 | |
| *Carex dapanshanica|XIAOFENG|NA|CHS|spm00000039* | Non-Himalayan | 0 | 1 | | 0 | 1 | |
| *Carex darwinii|LUCENO|NA|CLS|spm00000571* | Non-Himalayan | 0 | 1 | | 0 | 1 | |
| *Carex dasycarpa|STARR|B255|GEO|spm00000873* | Non-Himalayan | 0 | 1 | | 0 | 1 | |
| *Carex davalliana|WATERWAY|davaliana_2416|AUT|spm00002350* | Non-Himalayan | 0 | 1 | | 0 | 1 | |
| *Carex davidii|XIAOFENG|NA|CHN|spm00000040* | Non-Himalayan | 0 | 1 | | 0 | 1 | |
| *Carex davisii|STARR|B240|DEL|spm00000858* | Non-Himalayan | 0 | 1 | | 0 | 1 | |
| *Carex davyi|STARR|B856|CAL|spm00001459* | Non-Himalayan | 0 | 1 | | 0 | 1 | |
| *Carex deasyi|STARR_FORD|STA_7|EHM|spm00005198* | Both | 1 | 1 | | 1 | 1 | |
| *Carex debilis|STARR|B245|OKL|spm00000863* | Non-Himalayan | 0 | 1 | | 0 | 1 | |
| *Carex decidua|LUCENO|NA|CLS|spm00000570* | Non-Himalayan | 0 | 1 | | 0 | 1 | |
| *Carex decomposita|STARR|B218|DEL|spm00000836* | Non-Himalayan | 0 | 1 | | 0 | 1 | |
| *Carex decurtata|JIMENEZMEJIAS|||spm00004414* | Non-Himalayan | 0 | 1 | | 0 | 1 | |
| *Carex delicata|JIMENEZMEJIAS||TZK|spm00003358* | Non-Himalayan | 0 | 1 | | 0 | 1 | |
| *Carex demissa|STARR|B1341|NSC|spm00001948* | Both | 1 | 1 | | 1 | 1 | |
| *Carex densa|STARR|B1062|ORE|spm00001669* | Non-Himalayan | 0 | 1 | | 0 | 1 | |
| *Carex densipilosa|XIAOFENG|NA|CHS|spm00000042* | Non-Himalayan | 0 | 1 | | 0 | 1 | |
| *Carex depauperata|LUCENO|NA|YUG|spm00000574* | Non-Himalayan | 0 | 1 | | 0 | 1 | |
| *Carex derelicta|JIMENEZMEJIAS||CZE|spm00003350* | Non-Himalayan | 0 | 1 | | 0 | 1 | |
| *Carex deweyana|HIPP|deweyana_3162|WIS|spm00002359* | Non-Himalayan | 0 | 1 | | 0 | 1 | |
| *Carex diandra|STARR|B222|CAL|spm00000840* | Both | 1 | 1 | | 1 | 1 | |
| *Carex diastena|MAGUILLA|||spm00006010* | Non-Himalayan | 0 | 1 | | 0 | 1 | |
| *Carex digitata|LUCENO|NA|ITA|spm00000569* | Non-Himalayan | 0 | 1 | | 0 | 1 | |
| *Carex diluta|JIMENEZMEJIAS||TCS|spm00004364* | Both | 1 | 1 | | 1 | 1 | |
| *Carex dioica|STARR_FORD|STA_107|GRB|spm00005178* | Non-Himalayan | 0 | 1 | | 0 | 1 | |
| *Carex disperma|STARR|B1045|ARK|spm00001652* | Non-Himalayan | 0 | 1 | | 0 | 1 | |
| *Carex distachya|LUCENO|NA|SPA|spm00000588* | Non-Himalayan | 0 | 1 | | 0 | 1 | |
| *Carex distans|STARR|B226|GRC|spm00000844* | Non-Himalayan | 0 | 1 | | 0 | 1 | |
| *Carex disticha|STARR_FORD|STA_805|ONT|spm00005395* | Non-Himalayan | 0 | 1 | | 0 | 1 | |
| *Carex divisa|STARR_FORD||MAN|spm00005374* | Both | 1 | 1 | | 1 | 1 | |
| *Carex divulsa|JIMENEZMEJIAS||FRA|spm00004390* | Non-Himalayan | 0 | 1 | | 0 | 1 | |
| *Carex doniana|XIAOFENG|NA|CHS|spm00000047* | Both | 1 | 1 | | 1 | 1 | |
| *Carex douglasii|STARR_FORD|STA_807|COL|spm00005243* | Non-Himalayan | 0 | 1 | | 0 | 1 | |
| *Carex drucei|JIMENEZMEJIAS|||spm00004418* | Non-Himalayan | 0 | 1 | | 0 | 1 | |
| *Carex durangensis|REZNICEK|NA|MXE|spm00000272* | Non-Himalayan | 0 | 1 | | 0 | 1 | |
| *Carex durieui|JIMENEZMEJIAS||SPA|spm00004386* | Non-Himalayan | 0 | 1 | | 0 | 1 | |
| *Carex duriuscula|STARR|B1046|ARK|spm00001653* | Non-Himalayan | 0 | 1 | | 0 | 1 | |
| *Carex ebenea|STARR|B1263|ARI|spm00001870* | Non-Himalayan | 0 | 1 | | 0 | 1 | |
| *Carex eburnea|STARR|B224|MIC|spm00000842* | Non-Himalayan | 0 | 1 | | 0 | 1 | |
| *Carex echinata|STARR_FORD|STA_110|GRB|spm00005186* | Both | 1 | 1 | | 1 | 1 | |
| *Carex echinochloe|GEHRKE|Carex MOR_908||spm00004701* | Non-Himalayan | 0 | 1 | | 0 | 1 | |
| *Carex echinodes|HIPP|ten.echinodes_3158|WIS|spm00002699* | Non-Himalayan | 0 | 1 | | 0 | 1 | |
| *Carex ecklonii|JIMENEZMEJIAS||CPP|spm00004378* | Non-Himalayan | 0 | 1 | | 0 | 1 | |
| *Carex ecuadorensis|STARR_FORD|STA_148|ECU|spm00005088* | Non-Himalayan | 0 | 1 | | 0 | 1 | |
| *Carex edura|K_FORD|NA|NZS|spm00002184* | Non-Himalayan | 0 | 1 | | 0 | 1 | |
| *Carex edwardsiana|STARR|B1536|TEX|spm00002142* | Non-Himalayan | 0 | 1 | | 0 | 1 | |
| *Carex egena|SANGTAE|D0265|KOR?|spm00000329* | Non-Himalayan | 0 | 1 | | 0 | 1 | |
| *Carex egglestonii|STARR|B1095|CAL|spm00001702* | Non-Himalayan | 0 | 1 | | 0 | 1 | |
| *Carex egmontiana|JIMENEZMEJIAS|||spm00004416* | Non-Himalayan | 0 | 1 | | 0 | 1 | |
| *Carex ehrenbergiana|REZNICEK|NA|MXC|spm00000298* | Non-Himalayan | 0 | 1 | | 0 | 1 | |
| *Carex eleusinoides|STARR|B1016|ARK|spm00001623* | Non-Himalayan | 0 | 1 | | 0 | 1 | |
| *Carex elgonensis|GEHRKE|NA|UGA|spm00000189* | Non-Himalayan | 0 | 1 | | 0 | 1 | |
| *Carex elliottii|STARR|B1309|FLA|spm00001916* | Non-Himalayan | 0 | 1 | | 0 | 1 | |
| *Carex elongata|MAGUILLA|||spm00005946* | Non-Himalayan | 0 | 1 | | 0 | 1 | |
| *Carex emoryi|STARR|B267|DEL|spm00000885* | Non-Himalayan | 0 | 1 | | 0 | 1 | |
| *Carex endlichii|STARR|B1489|ARI|spm00002095* | Non-Himalayan | 0 | 1 | | 0 | 1 | |
| *Carex engelmannii|STARR|B1525|BRC|spm00002131* | Non-Himalayan | 0 | 1 | | 0 | 1 | |
| *Carex enneastachya|JIMENEZMEJIAS|NA|ECU|spm00000600* | Non-Himalayan | 0 | 1 | | 0 | 1 | |
| *Carex erebus|JIMENEZMEJIAS|||spm00004424* | Non-Himalayan | 0 | 1 | | 0 | 1 | |
| *Carex ericetorum|LUCENO|NA|ITA|spm00000551* | Non-Himalayan | 0 | 1 | | 0 | 1 | |
| *Carex erinacea|STARR_FORD|STA_142|CLC|spm00005214* | Non-Himalayan | 0 | 1 | | 0 | 1 | |
| *Carex eriophylla|JIMENEZMEJIAS|NA|CHM|spm00003460* | Non-Himalayan | 0 | 1 | | 0 | 1 | |
| *Carex erythrorrhiza|GEHRKE|NA|ETH|spm00000191* | Non-Himalayan | 0 | 1 | | 0 | 1 | |
| *Carex erythrovaginata|STARR_FORD|STA_55|NZ?|spm00005096* | Non-Himalayan | 0 | 1 | | 0 | 1 | |
| *Carex esenbeckii|STARR_FORD|STA_5|EHM|spm00005193* | Both | 1 | 1 | | 1 | 1 | |
| *Carex euryphylla|HIPP|NA|MDG|spm00002218* | Non-Himalayan | 0 | 1 | | 0 | 1 | |
| *Carex exilis|STARR|B269|DEL|spm00000887* | Non-Himalayan | 0 | 1 | | 0 | 1 | |
| *Carex exsiccata|STARR|B1369|BRC|spm00001976* | Non-Himalayan | 0 | 1 | | 0 | 1 | |
| *Carex extensa|STARR|B1246|VRG|spm00001853* | Non-Himalayan | 0 | 1 | | 0 | 1 | |
| *Carex fecunda|STARR_FORD|STA_814|BOL|spm00005222* | Non-Himalayan | 0 | 1 | | 0 | 1 | |
| *Carex fedia|JIMENEZMEJIAS|NA|PAK|spm00003461* | Both | 1 | 1 | | 1 | 1 | |
| *Carex festucacea|STARR|B274|TEX|spm00000892* | Non-Himalayan | 0 | 1 | | 0 | 1 | |
| *Carex feta|STARR|B275|CAL|spm00000893* | Non-Himalayan | 0 | 1 | | 0 | 1 | |
| *Carex filicina|PAK|183073* | Both | 1 | 1 | | 1 | 1 | |
| *Carex filifolia|STARR_FORD||MAN|spm00005150* | Non-Himalayan | 0 | 1 | | 0 | 1 | |
| *Carex filipes|JIMENEZMEJIAS|NA|CHM|spm00003462* | Non-Himalayan | 0 | 1 | | 0 | 1 | |
| *Carex filispica|JIMENEZMEJIAS||CHC|spm00003398* | Both | 1 | 1 | | 1 | 0 | |
| *Carex fimbriata|LUCENO|NA|SWI|spm00000552* | Non-Himalayan | 0 | 1 | | 0 | 1 | |
| *Carex finitima|CHC|E00269484* | Both | 1 | 1 | | 1 | 1 | |
| *Carex firma|LUCENO|NA|ITA|spm00000520* | Non-Himalayan | 0 | 1 | | 0 | 1 | |
| *Carex firmula|STARR_FORD|STA_17|ECU|spm00005111* | Non-Himalayan | 0 | 1 | | 0 | 1 | |
| *Carex fischeri|JIMENEZMEJIAS||ETH|spm00004352* | Non-Himalayan | 0 | 1 | | 0 | 1 | |
| *Carex fissa|STARR_FORD|STA_815|FLA|spm00005400* | Non-Himalayan | 0 | 1 | | 0 | 1 | |
| *Carex fissiglumis|EHM|E00693544* | Both | 1 | 1 | | 1 | 0 | |
| *Carex fissirostris|JIMENEZMEJIAS||MOR|spm00004379* | Non-Himalayan | 0 | 1 | | 0 | 1 | |
| *Carex fissuricola|STARR|B1511|IDA|spm00002117* | Non-Himalayan | 0 | 1 | | 0 | 1 | |
| *Carex flacca|STARR|B1202|CAL|spm00001809* | Non-Himalayan | 0 | 1 | | 1 | 1 | |
| *Carex flaccosperma|STARR|B052|LOU|spm00000671* | Non-Himalayan | 0 | 1 | | 0 | 1 | |
| *Carex flava|STARR|B881|NFL|spm00001483* | Non-Himalayan | 0 | 1 | | 0 | 1 | |
| *Carex floridana|STARR|B288|FLA|spm00000906* | Non-Himalayan | 0 | 1 | | 0 | 1 | |
| *Carex fluviatilis|HIPP|fluviatilis_321|CHC|spm00002407* | Non-Himalayan | 0 | 1 | | 1 | 1 | |
| *Carex foenea|STARR|B1393|BRC|spm00002000* | Non-Himalayan | 0 | 1 | | 0 | 1 | |
| *Carex foetida|LUCENO|NA|SWI|spm00000565* | Non-Himalayan | 0 | 1 | | 0 | 1 | |
| *Carex folliculata|STARR|B293|DEL|spm00000911* | Non-Himalayan | 0 | 1 | | 0 | 1 | |
| *Carex foraminata|XIAOFENG|NA|CHS|spm00000052* | Non-Himalayan | 0 | 1 | | 0 | 1 | |
| *Carex formosa|STARR|B1125|ILL|spm00001732* | Non-Himalayan | 0 | 1 | | 0 | 1 | |
| *Carex forsteri|K_FORD|NA|NZS|spm00002183* | Non-Himalayan | 0 | 1 | | 0 | 1 | |
| *Carex fracta|STARR|B278|CAL|spm00000896* | Non-Himalayan | 0 | 1 | | 0 | 1 | |
| *Carex frankii|STARR|B321|ALA|spm00000939* | Non-Himalayan | 0 | 1 | | 0 | 1 | |
| *Carex fraseriana|STARR|B334|MRY|spm00000952* | Non-Himalayan | 0 | 1 | | 0 | 1 | |
| *Carex frigida|LUCENO|NA|SPA|spm00000521* | Non-Himalayan | 0 | 1 | | 0 | 1 | |
| *Carex fritschii|MESTERHAZY|NA|HUN|spm00002174* | Non-Himalayan | 0 | 1 | | 0 | 1 | |
| *Carex fucata|CHC|5778634* | Himalayan | 1 | 0 | | 1 | 0 | |
| *Carex fuliginosa|STARR|B1020|ARK|spm00001627* | Non-Himalayan | 0 | 1 | | 0 | 1 | |
| *Carex furva|MAGUILLA|||spm00006011* | Non-Himalayan | 0 | 1 | | 0 | 1 | |
| *Carex fuscula|JIMENEZMEJIAS||CLC|spm00004370* | Non-Himalayan | 0 | 1 | | 0 | 1 | |
| *Carex fusiformis|EHM|E00666305* | Himalayan | 1 | 0 | | 1 | 0 | |
| *Carex gammiei|SHUREN|K_gammiei_LJQ||spm00003640* | Both | 1 | 1 | | 1 | 0 | |
| *Carex garberi|STARR|B1017|ARK|spm00001624* | Non-Himalayan | 0 | 1 | | 0 | 1 | |
| *Carex gayana|LUCENO|NA|CLS|spm00000573* | Non-Himalayan | 0 | 1 | | 0 | 1 | |
| *Carex genkaiensis|HIPP|NA|KOR|spm00000011* | Non-Himalayan | 0 | 1 | | 0 | 1 | |
| *Carex gentilis|CHC|5306057* | Non-Himalayan | 0 | 1 | | 1 | 1 | |
| *Carex geophila|STARR|B322|TEX|spm00000940* | Non-Himalayan | 0 | 1 | | 0 | 1 | |
| *Carex geyeri|STARR|B324|ABT|spm00000942* | Non-Himalayan | 0 | 1 | | 0 | 1 | |
| *Carex gholsonii|STARR|B335|ALA|spm00000953* | Non-Himalayan | 0 | 1 | | 0 | 1 | |
| *Carex gibba|STARR_FORD|STA_816|CHH|spm00005244* | Non-Himalayan | 0 | 1 | | 0 | 1 | |
| *Carex gifuensis|SANGTAE|E0180|KOR?|spm00000331* | Non-Himalayan | 0 | 1 | | 0 | 1 | |
| *Carex gigantea|STARR|B299|FLA|spm00000917* | Non-Himalayan | 0 | 1 | | 0 | 1 | |
| *Carex giraldiana|XIAOFENG|NA|CHN|spm00000054* | Non-Himalayan | 0 | 1 | | 0 | 1 | |
| *Carex glabrescens|SANGTAE|D0449|KOR?|spm00000332* | Non-Himalayan | 0 | 1 | | 0 | 1 | |
| *Carex glacialis|STARR|B887|NFL|spm00001488* | Non-Himalayan | 0 | 1 | | 0 | 1 | |
| *Carex glareosa|MAGUILLA|||spm00004628* | Non-Himalayan | 0 | 1 | | 0 | 1 | |
| *Carex glaucescens|STARR|B308|MSI|spm00000926* | Non-Himalayan | 0 | 1 | | 0 | 1 | |
| *Carex glaucodea|STARR|B924|INI|spm00001525* | Non-Himalayan | 0 | 1 | | 0 | 1 | |
| *Carex globosa|STARR|B302|CAL|spm00000920* | Non-Himalayan | 0 | 1 | | 0 | 1 | |
| *Carex globularis|JIMENEZMEJIAS||YAK|spm00004387* | Non-Himalayan | 0 | 1 | | 0 | 1 | |
| *Carex glomerabilis|GEHRKE|NA|CPP|spm00000193* | Non-Himalayan | 0 | 1 | | 0 | 1 | |
| *Carex gmelinii|STARR|B1022|ARK|spm00001629* | Non-Himalayan | 0 | 1 | | 0 | 1 | |
| *Carex godfreyi|STARR|B1180|ALA|spm00001787* | Non-Himalayan | 0 | 1 | | 0 | 1 | |
| *Carex gongshanensis|JIMENEZMEJIAS||CHT|spm00003361* | Non-Himalayan | 0 | 1 | | 1 | 0 | |
| *Carex gotoi|HIPP|NA|KOR|spm00000020* | Non-Himalayan | 0 | 1 | | 0 | 1 | |
| *Carex gracilior|STARR|B1085|CAL|spm00001692* | Non-Himalayan | 0 | 1 | | 0 | 1 | |
| *Carex gracillima|HIPP|gracillima_505|WIS|spm00002423* | Non-Himalayan | 0 | 1 | | 0 | 1 | |
| *Carex graminifolia|GEHRKE|NA|MDG|spm00000195* | Non-Himalayan | 0 | 1 | | 0 | 1 | |
| *Carex grandiligulata|XIAOFENG|NA|CHS|spm00000056* | Non-Himalayan | 0 | 1 | | 0 | 1 | |
| *Carex granularis|STARR|B804|MAN|spm00001407* | Non-Himalayan | 0 | 1 | | 0 | 1 | |
| *Carex gravida|STARR|B352|TEN|spm00000970* | Non-Himalayan | 0 | 1 | | 0 | 1 | |
| *Carex grayi|STARR|B306|TEN|spm00000924* | Non-Himalayan | 0 | 1 | | 0 | 1 | |
| *Carex greenwayi|JIMENEZMEJIAS||TAN|spm00004344* | Non-Himalayan | 0 | 1 | | 0 | 1 | |
| *Carex grioletii|LUCENO|NA|SPA|spm00000585* | Non-Himalayan | 0 | 1 | | 0 | 1 | |
| *Carex grisea|STARR|B037|KTY|spm00000656* | Non-Himalayan | 0 | 1 | | 0 | 1 | |
| *Carex gunniana|JIMENEZMEJIAS||TAS|spm00004360* | Non-Himalayan | 0 | 1 | | 0 | 1 | |
| *Carex gynandra|STARR|B346|DEL|spm00000964* | Non-Himalayan | 0 | 1 | | 0 | 1 | |
| *Carex gynocrates|STARR|B1023|ARK|spm00001630* | Non-Himalayan | 0 | 1 | | 0 | 1 | |
| *Carex gynodynama|STARR|B1081|CAL|spm00001688* | Non-Himalayan | 0 | 1 | | 0 | 1 | |
| *Carex gypsophila|REZNICEK|NA|MXE|spm00000361* | Non-Himalayan | 0 | 1 | | 0 | 1 | |
| *Carex haematostoma|JIMENEZMEJIAS||CHT|spm00003383* | Both | 1 | 1 | | 1 | 1 | |
| *Carex halleriana|LUCENO|NA|SPA|spm00000557* | Non-Himalayan | 0 | 1 | | 1 | 1 | |
| *Carex halliana|STARR|B1082|CAL|spm00001689* | Non-Himalayan | 0 | 1 | | 0 | 1 | |
| *Carex hallii|STARR|B1147|MAN|spm00001754* | Non-Himalayan | 0 | 1 | | 0 | 1 | |
| *Carex hamata|STARR_FORD|STA_145|ECU|spm00005093* | Non-Himalayan | 0 | 1 | | 0 | 1 | |
| *Carex hancockiana|JIMENEZMEJIAS|NA|CHM|spm00003463* | Non-Himalayan | 0 | 1 | | 0 | 1 | |
| *Carex handelmazzettii|SHUREN|K_handcl_mazzettii_LJQ||spm00003629* | Both | 1 | 1 | | 1 | 0 | |
| *Carex harae|EHM|E00048402* | Himalayan | 1 | 0 | | 1 | 0 | |
| *Carex harfordii|STARR|B347|CAL|spm00000965* | Non-Himalayan | 0 | 1 | | 0 | 1 | |
| *Carex hartmanii|GEBAUER||GER|spm00006155* | Non-Himalayan | 0 | 1 | | 0 | 1 | |
| *Carex hassei|STARR|B1260|CAL|spm00001867* | Non-Himalayan | 0 | 1 | | 0 | 1 | |
| *Carex hastata|XIAOFENG|NA|CHS|spm00000058* | Non-Himalayan | 0 | 1 | | 0 | 1 | |
| *Carex haydeniana|HIPP|haydeniana_140.2|UTA|spm00002432* | Non-Himalayan | 0 | 1 | | 0 | 1 | |
| *Carex haydenii|HIPP|haydenii_501|WIS|spm00002433* | Non-Himalayan | 0 | 1 | | 0 | 1 | |
| *Carex healyi|STARR_FORD|STA_137|NZN|spm00005107* | Non-Himalayan | 0 | 1 | | 0 | 1 | |
| *Carex hebes|WATERWAY|hebes_2329|NSW|spm00002434* | Non-Himalayan | 0 | 1 | | 0 | 1 | |
| *Carex heleonastes|STARR|B1347|ABT|spm00001954* | Non-Himalayan | 0 | 1 | | 0 | 1 | |
| *Carex helleri|STARR|B861|CAL|spm00001464* | Non-Himalayan | 0 | 1 | | 0 | 1 | |
| *Carex helodes|JIMENEZMEJIAS||MOR|spm00004359* | Non-Himalayan | 0 | 1 | | 0 | 1 | |
| *Carex hendersonii|STARR|B1340|BRC|spm00001947* | Non-Himalayan | 0 | 1 | | 0 | 1 | |
| *Carex heterodoxa|HIPP|NA|MDG|spm00002213* | Non-Himalayan | 0 | 1 | | 0 | 1 | |
| *Carex heteroneura|STARR|B307|NEV|spm00000925* | Non-Himalayan | 0 | 1 | | 0 | 1 | |
| *Carex heterostachya|JIMENEZMEJIAS|NA|CHN|spm00003464* | Non-Himalayan | 0 | 1 | | 0 | 1 | |
| *Carex hirsutella|STARR|B317|DEL|spm00000935* | Non-Himalayan | 0 | 1 | | 0 | 1 | |
| *Carex hirta|STARR|B329|PEN|spm00000947* | Non-Himalayan | 0 | 1 | | 0 | 1 | |
| *Carex hirtifolia|STARR|B872|QUE|spm00001475* | Non-Himalayan | 0 | 1 | | 0 | 1 | |
| *Carex hirtigluma|GEHRKE|NA|MDG|spm00000196* | Non-Himalayan | 0 | 1 | | 0 | 1 | |
| *Carex hirtissima|STARR|B1087|CAL|spm00001694* | Non-Himalayan | 0 | 1 | | 0 | 1 | |
| *Carex hispida|LUCENO|NA|KRI|spm00000549* | Non-Himalayan | 0 | 1 | | 0 | 1 | |
| *Carex hitchcockiana|STARR|B038|KTY|spm00000657* | Non-Himalayan | 0 | 1 | | 0 | 1 | |
| *Carex hochstetteriana|ESCUDERO||POR|spm00002856* | Non-Himalayan | 0 | 1 | | 0 | 1 | |
| *Carex holostoma|STARR|B1024|ARK|spm00001631* | Non-Himalayan | 0 | 1 | | 0 | 1 | |
| *Carex hoodii|STARR|B1323|CAL|spm00001930* | Non-Himalayan | 0 | 1 | | 0 | 1 | |
| *Carex hookeriana|STARR_FORD|STA_819|MAN|spm00005409* | Non-Himalayan | 0 | 1 | | 0 | 1 | |
| *Carex horizontalis|STARR_FORD|STA_73|NZS|spm00005106* | Non-Himalayan | 0 | 1 | | 0 | 1 | |
| *Carex hormathodes|STARR|B1508|NSC|spm00002114* | Non-Himalayan | 0 | 1 | | 0 | 1 | |
| *Carex hostiana|LUCENO||Germany|spm00003273* | Non-Himalayan | 0 | 1 | | 0 | 1 | |
| *Carex houghtoniana|STARR|B843|MAN|spm00001446* | Non-Himalayan | 0 | 1 | | 0 | 1 | |
| *Carex hughii|SHUREN|K_graminifolia_F_ZSL||spm00003650* | Both | 1 | 1 | | 1 | 1 | |
| *Carex hultenii|REZNICEK|NA|MXE|spm00000273* | Non-Himalayan | 0 | 1 | | 0 | 1 | |
| *Carex humbertiana|HIPP|NA|KOR|spm00000006* | Non-Himalayan | 0 | 1 | | 0 | 1 | |
| *Carex humboldtiana|REZNICEK|NA|MXC|spm00000271* | Non-Himalayan | 0 | 1 | | 0 | 1 | |
| *Carex hyalina|STARR|B294|MSI|spm00000912* | Non-Himalayan | 0 | 1 | | 0 | 1 | |
| *Carex hyalinolepis|STARR|B338|TEX|spm00000956* | Non-Himalayan | 0 | 1 | | 0 | 1 | |
| *Carex hypochlora|XIAOFENG|NA|CHN|spm00000060* | Non-Himalayan | 0 | 1 | | 0 | 1 | |
| *Carex hystericina|STARR|B475|ARK|spm00001081* | Non-Himalayan | 0 | 1 | | 0 | 1 | |
| *Carex idaea|JIMENEZMEJIAS||KRI|spm00004380* | Non-Himalayan | 0 | 1 | | 0 | 1 | |
| *Carex idahoa|STARR|B956|MNT|spm00001563* | Non-Himalayan | 0 | 1 | | 0 | 1 | |
| *Carex iljinii|HIPP|iljinii_1964|BRY|spm00002443* | Non-Himalayan | 0 | 1 | | 0 | 1 | |
| *Carex illota|STARR|B343|CAL|spm00000961* | Non-Himalayan | 0 | 1 | | 0 | 1 | |
| *Carex imbecilla|JIMENEZMEJIAS|||spm00004419* | Non-Himalayan | 0 | 1 | | 0 | 1 | |
| *Carex impressinervia|STARR|B1177|MSI|spm00001784* | Non-Himalayan | 0 | 1 | | 0 | 1 | |
| *Carex inanis|JIMENEZMEJIAS||CHT|spm00003363* | Both | 1 | 1 | | 1 | 0 | |
| *Carex incomitata|WATERWAY|incomitata_1789|NSW|spm00002446* | Non-Himalayan | 0 | 1 | | 0 | 1 | |
| *Carex incurviformis|STARR|B1495|COL|spm00002101* | Non-Himalayan | 0 | 1 | | 0 | 1 | |
| *Carex indica|HIPP|NA|QLD|spm00002191* | Both | 1 | 1 | | 1 | 1 | |
| *Carex infirminervia|STARR|B795|CAL|spm00001398* | Non-Himalayan | 0 | 1 | | 0 | 1 | |
| *Carex infuscata|PAK|183079* | Both | 1 | 1 | | 1 | 0 | |
| *Carex integra|STARR|B359|CAL|spm00000977* | Non-Himalayan | 0 | 1 | | 0 | 1 | |
| *Carex interior|STARR|B354|MIC|spm00000972* | Non-Himalayan | 0 | 1 | | 0 | 1 | |
| *Carex interjecta|HIPP|interjecta_15398|MXC|spm00002454* | Non-Himalayan | 0 | 1 | | 0 | 1 | |
| *Carex interrupta|STARR|B1059|ORE|spm00001666* | Non-Himalayan | 0 | 1 | | 0 | 1 | |
| *Carex intumescens|STARR|B357|MAI|spm00000975* | Non-Himalayan | 0 | 1 | | 0 | 1 | |
| *Carex ischnostachya|XIAOFENG|NA|CHS|spm00000062* | Non-Himalayan | 0 | 1 | | 0 | 1 | |
| *Carex ivanoviae|JIMENEZMEJIAS||CHQ|spm00003371* | Non-Himalayan | 0 | 1 | | 1 | 1 | |
| *Carex jackiana|EHM|E00666333* | Both | 1 | 1 | | 1 | 1 | |
| *Carex jamesii|STARR|B010|ALA|spm00000630* | Non-Himalayan | 0 | 1 | | 0 | 1 | |
| *Carex jamesonii|JIMENEZMEJIAS|NA|VEN|spm00000517* | Non-Himalayan | 0 | 1 | | 0 | 1 | |
| *Carex jiuhuaensis|XIAOFENG|NA|CHS|spm00000063* | Non-Himalayan | 0 | 1 | | 0 | 1 | |
| *Carex johnstonii|GEHRKE|NA|UGA|spm00000200* | Non-Himalayan | 0 | 1 | | 0 | 1 | |
| *Carex jonesii|STARR|B1003|WAS|spm00001610* | Non-Himalayan | 0 | 1 | | 0 | 1 | |
| *Carex joorii|STARR|B367|FLA|spm00000985* | Non-Himalayan | 0 | 1 | | 0 | 1 | |
| *Carex juniperorum|STARR|B011|KTY|spm00000631* | Non-Himalayan | 0 | 1 | | 0 | 1 | |
| *Carex kamagariensis|SANGTAE|D0218|KOR?|spm00000336* | Non-Himalayan | 0 | 1 | | 0 | 1 | |
| *Carex kanaii|SHUREN|K_kanai_LJQ||spm00003637* | Himalayan | 1 | 0 | | 1 | 0 | |
| *Carex kansuensis|JIMENEZMEJIAS||CHC|spm00003365* | Non-Himalayan | 0 | 1 | | 1 | 1 | |
| *Carex killickii|STARR_FORD|STA_47|CPP|spm00005203* | Non-Himalayan | 0 | 1 | | 0 | 1 | |
| *Carex kingii|STARR_FORD|STA_80|CLS|spm00005221* | Non-Himalayan | 0 | 1 | | 0 | 1 | |
| *Carex kirinensis|JIMENEZMEJIAS||CHT|spm00003366* | Non-Himalayan | 0 | 1 | | 0 | 1 | |
| *Carex kirkii|JIMENEZMEJIAS|||spm00004417* | Non-Himalayan | 0 | 1 | | 0 | 1 | |
| *Carex kitaibeliana|LUCENO|NA|YUG|spm00000539* | Non-Himalayan | 0 | 1 | | 0 | 1 | |
| *Carex klamathensis|STARR|B1463|ORE|spm00002069* | Non-Himalayan | 0 | 1 | | 0 | 1 | |
| *Carex kobomugi|STARR|B361|VRG|spm00000979* | Non-Himalayan | 0 | 1 | | 0 | 1 | |
| *Carex kobresiformis|XIAOFENG|NA|CHS|spm00000067* | Non-Himalayan | 0 | 1 | | 0 | 1 | |
| *Carex kokanica|SHUREN|K_minshanica_ZSR_K||spm00003613* | Both | 1 | 1 | | 1 | 1 | |
| *Carex koshewnikowii|JIMENEZMEJIAS|NA|TZK|spm00003465* | Both | 1 | 1 | | 1 | 1 | |
| *Carex kraliana|STARR|B363|ARK|spm00000981* | Non-Himalayan | 0 | 1 | | 0 | 1 | |
| *Carex krausei|STARR|B1032|ARK|spm00001639* | Non-Himalayan | 0 | 1 | | 0 | 1 | |
| *Carex kumaonensis|EHM|E00656734* | Both | 1 | 1 | | 1 | 0 | |
| *Carex kurdica|LUCENO||Iran|spm00003158* | Non-Himalayan | 0 | 1 | | 0 | 1 | |
| *Carex lachenalii|STARR|B1033|ARK|spm00001640* | Non-Himalayan | 0 | 1 | | 0 | 1 | |
| *Carex lacustris|STARR|B373|MAN|spm00000991* | Non-Himalayan | 0 | 1 | | 0 | 1 | |
| *Carex laeta|JIMENEZMEJIAS||CHT|spm00003394* | Both | 1 | 1 | | 1 | 0 | |
| *Carex laeviconica|STARR|B1280|TEN|spm00001887* | Non-Himalayan | 0 | 1 | | 0 | 1 | |
| *Carex laeviculmis|STARR|B794|CAL|spm00001397* | Non-Himalayan | 0 | 1 | | 0 | 1 | |
| *Carex laevigata|JIMENEZMEJIAS||FRA|spm00004373* | Non-Himalayan | 0 | 1 | | 0 | 1 | |
| *Carex laevissima|STARR_FORD|STA_828|PRM|spm00005425* | Non-Himalayan | 0 | 1 | | 0 | 1 | |
| *Carex laevivaginata|STARR|B375|ALA|spm00000993* | Non-Himalayan | 0 | 1 | | 0 | 1 | |
| *Carex lagunensis|HIPP|lagunensis_4482|MXE|spm00002467* | Non-Himalayan | 0 | 1 | | 0 | 1 | |
| *Carex lainzii|JIMENEZMEJIAS||SPA|spm00004371* | Non-Himalayan | 0 | 1 | | 0 | 1 | |
| *Carex lancea|STARR_FORD|STA_48|CPP|spm00005204* | Non-Himalayan | 0 | 1 | | 0 | 1 | |
| *Carex lancifolia|XIAOFENG|NA|CHN|spm00000070* | Non-Himalayan | 0 | 1 | | 0 | 1 | |
| *Carex lapponica|STARR|B1034|ARK|spm00001641* | Non-Himalayan | 0 | 1 | | 0 | 1 | |
| *Carex larensis|JIMENEZMEJIAS|NA|VEN|spm00000601* | Non-Himalayan | 0 | 1 | | 0 | 1 | |
| *Carex lasiocarpa|STARR|B379|ARK|spm00000997* | Non-Himalayan | 0 | 1 | | 0 | 1 | |
| *Carex latebracteata|STARR|B779|ARK|spm00001383* | Non-Himalayan | 0 | 1 | | 0 | 1 | |
| *Carex lativena|STARR|B1222|NWM|spm00001829* | Non-Himalayan | 0 | 1 | | 0 | 1 | |
| *Carex laxa|STARR|B1036|ARK|spm00001643* | Non-Himalayan | 0 | 1 | | 0 | 1 | |
| *Carex laxiflora|STARR|B405|MIC|spm00001023* | Non-Himalayan | 0 | 1 | | 0 | 1 | |
| *Carex leavenworthii|STARR_FORD|STA_830|KTY|spm00005410* | Non-Himalayan | 0 | 1 | | 0 | 1 | |
| *Carex ledebouriana|JIMENEZMEJIAS||MAG|spm00003592* | Non-Himalayan | 0 | 1 | | 0 | 1 | |
| *Carex leersii|JIMENEZMEJIAS||SPA|spm00004393* | Both | 1 | 1 | | 1 | 1 | |
| *Carex lehmannii|JIMENEZMEJIAS||CHC|spm00003367* | Both | 1 | 1 | | 1 | 1 | |
| *Carex leiorhyncha|HIPP|leiorhyncha_2001|KOR|spm00002471* | Non-Himalayan | 0 | 1 | | 0 | 1 | |
| *Carex lemmonii|STARR|B411|CAL|spm00001029* | Non-Himalayan | 0 | 1 | | 0 | 1 | |
| *Carex leporina|STARR|B1173|WIS|spm00001780* | Both | 1 | 1 | | 1 | 1 | |
| *Carex leporinella|STARR|B1006|WAS|spm00001613* | Non-Himalayan | 0 | 1 | | 0 | 1 | |
| *Carex leptalea|STARR|B414|MIC|spm00001032* | Non-Himalayan | 0 | 1 | | 0 | 1 | |
| *Carex leptocladus|MESTERHAZY|NA|GGI|spm00002180* | Non-Himalayan | 0 | 1 | | 0 | 1 | |
| *Carex leptonervia|STARR|B790|MAN|spm00001394* | Non-Himalayan | 0 | 1 | | 0 | 1 | |
| *Carex leptopoda|STARR|B796|BRC|spm00001399* | Non-Himalayan | 0 | 1 | | 0 | 1 | |
| *Carex leptosaccus|GEHRKE|NA|UGA|spm00000201* | Non-Himalayan | 0 | 1 | | 0 | 1 | |
| *Carex leucodonta|REZNICEK|NA|MXE|spm00000269* | Non-Himalayan | 0 | 1 | | 0 | 1 | |
| *Carex lianchengensis|XIAOFENG|NA|CHS|spm00000073* | Non-Himalayan | 0 | 1 | | 0 | 1 | |
| *Carex limosa|STARR|B417|ARK|spm00001035* | Non-Himalayan | 0 | 1 | | 0 | 1 | |
| *Carex lingii|SHUREN|C_lingii_BHY||spm00003612* | Non-Himalayan | 0 | 1 | | 0 | 1 | |
| *Carex liparocarpos|LUCENO|NA|SPA|spm00000556* | Non-Himalayan | 0 | 1 | | 0 | 1 | |
| *Carex littledalei|JIMENEZMEJIAS||CHT|spm00003404* | Non-Himalayan | 0 | 1 | | 1 | 0 | |
| *Carex litvinovii|JIMENEZMEJIAS|NA|TZK|spm00003467* | Non-Himalayan | 0 | 1 | | 0 | 1 | |
| *Carex livida|STARR|B807|NWJ|spm00001410* | Non-Himalayan | 0 | 1 | | 0 | 1 | |
| *Carex loliacea|STARR|B1043|ARK|spm00001650* | Non-Himalayan | 0 | 1 | | 0 | 1 | |
| *Carex lonchocarpa|STARR|B381|FLA|spm00000999* | Non-Himalayan | 0 | 1 | | 0 | 1 | |
| *Carex longicaulis|REZNICEK|NA|MXG|spm00000274* | Non-Himalayan | 0 | 1 | | 0 | 1 | |
| *Carex longicruris|EHM|E00693600* | Both | 1 | 1 | | 1 | 1 | |
| *Carex longifructus|JIMENEZMEJIAS|||spm00004426* | Non-Himalayan | 0 | 1 | | 0 | 1 | |
| *Carex longii|STARR|B383|ARK|spm00001001* | Non-Himalayan | 0 | 1 | | 0 | 1 | |
| *Carex longipedunculata|GEHRKE|NA|KEN|spm00000167* | Non-Himalayan | 0 | 1 | | 0 | 1 | |
| *Carex longipes|EHM|E00693601* | Both | 1 | 1 | | 1 | 1 | |
| *Carex longirostrata|XIAOFENG|NA|CHS|spm00000077* | Non-Himalayan | 0 | 1 | | 0 | 1 | |
| *Carex longissima|REZNICEK|NA|MXE|spm00000275* | Non-Himalayan | 0 | 1 | | 0 | 1 | |
| *Carex louisianica|STARR|B390|FLA|spm00001008* | Non-Himalayan | 0 | 1 | | 0 | 1 | |
| *Carex lowei|ESCUDERO||MDR|spm00002858* | Non-Himalayan | 0 | 1 | | 0 | 1 | |
| *Carex ludwigii|GEHRKE|NA|NAT|spm00000147* | Non-Himalayan | 0 | 1 | | 0 | 1 | |
| *Carex lupuliformis|STARR|B393|FLA|spm00001011* | Non-Himalayan | 0 | 1 | | 0 | 1 | |
| *Carex lupulina|STARR|B472|MRY|spm00001078* | Non-Himalayan | 0 | 1 | | 0 | 1 | |
| *Carex lurida|STARR|B476|FLA|spm00001082* | Non-Himalayan | 0 | 1 | | 0 | 1 | |
| *Carex lutea|STARR|B1158|NCA|spm00001765* | Non-Himalayan | 0 | 1 | | 0 | 1 | |
| *Carex luzulifolia|STARR|B410|CAL|spm00001028* | Non-Himalayan | 0 | 1 | | 0 | 1 | |
| *Carex lycurus|GEHRKE|NA|MLW|spm00000206* | Non-Himalayan | 0 | 1 | | 0 | 1 | |
| *Carex lyngbyei|STARR|B479|ORE|spm00001085* | Non-Himalayan | 0 | 1 | | 0 | 1 | |
| *Carex maackii|HIPP|maackii_8031|JAP|spm00002491* | Non-Himalayan | 0 | 1 | | 0 | 1 | |
| *Carex mabilliana|JIMENEZMEJIAS|NA|COR|spm00000594* | Non-Himalayan | 0 | 1 | | 0 | 1 | |
| *Carex mackenziei|STARR|B1050|ARK|spm00001657* | Non-Himalayan | 0 | 1 | | 0 | 1 | |
| *Carex macloviana|HIPP|macloviana_1008|COL|spm00002492* | Non-Himalayan | 0 | 1 | | 0 | 1 | |
| *Carex macrocephala|STARR|B831|ARK|spm00001434* | Non-Himalayan | 0 | 1 | | 0 | 1 | |
| *Carex macrochaeta|STARR|B1064|ORE|spm00001671* | Non-Himalayan | 0 | 1 | | 0 | 1 | |
| *Carex macrolepis|LUCENO|NA|ITA|spm00000536* | Non-Himalayan | 0 | 1 | | 0 | 1 | |
| *Carex macrophyllidion|GEHRKE|Carex MOR_913||spm00004706* | Non-Himalayan | 0 | 1 | | 0 | 1 | |
| *Carex macroprophylla|JIMENEZMEJIAS||CHC|spm00003400* | Non-Himalayan | 0 | 1 | | 0 | 1 | |
| *Carex macrosolen|LUCENO|NA|AGS|spm00000553* | Non-Himalayan | 0 | 1 | | 0 | 1 | |
| *Carex macrostachys|LUCENO|NA|ITA|spm00000523* | Non-Himalayan | 0 | 1 | | 0 | 1 | |
| *Carex macrostyla|LUCENO||Spain|spm00003284* | Non-Himalayan | 0 | 1 | | 0 | 1 | |
| *Carex madagascariensis|HIPP|NA|MDG|spm00002210* | Non-Himalayan | 0 | 1 | | 0 | 1 | |
| *Carex madida|STARR_FORD|STA_14|ECU|spm00005095* | Non-Himalayan | 0 | 1 | | 0 | 1 | |
| *Carex madrensis|REZNICEK|NA|MXS|spm00000277* | Non-Himalayan | 0 | 1 | | 0 | 1 | |
| *Carex magacis|JIMENEZMEJIAS||SPA|spm00004395* | Non-Himalayan | 0 | 1 | | 0 | 1 | |
| *Carex magellanica|LUCENO||Finland|spm00003017* | Non-Himalayan | 0 | 1 | | 0 | 1 | |
| *Carex mairei|JIMENEZMEJIAS||SPA|spm00004367* | Non-Himalayan | 0 | 1 | | 0 | 1 | |
| *Carex manhartii|STARR|B1154|GEO|spm00001761* | Non-Himalayan | 0 | 1 | | 0 | 1 | |
| *Carex mannii|GEHRKE|NA|KEN|spm00000210* | Non-Himalayan | 0 | 1 | | 0 | 1 | |
| *Carex marianensis|REZNICEK|NA|MXE|spm00000280* | Non-Himalayan | 0 | 1 | | 0 | 1 | |
| *Carex marina|STARR|B1139|MAN|spm00001746* | Non-Himalayan | 0 | 1 | | 0 | 1 | |
| *Carex mariposana|STARR|B1277|ARI|spm00001884* | Non-Himalayan | 0 | 1 | | 0 | 1 | |
| *Carex maritima|WATERWAY|maritima_1048|YUK|spm00002500* | Both | 1 | 1 | | 1 | 1 | |
| *Carex meadii|STARR|B1135|MAN|spm00001742* | Non-Himalayan | 0 | 1 | | 0 | 1 | |
| *Carex media|STARR|B1165|NBR|spm00001772* | Non-Himalayan | 0 | 1 | | 0 | 1 | |
| *Carex megalepis|STARR_FORD|STA_69|NZ?|spm00005089* | Non-Himalayan | 0 | 1 | | 0 | 1 | |
| *Carex melanantha|JIMENEZMEJIAS||KAZ|spm00003368* | Both | 1 | 1 | | 1 | 1 | |
| *Carex melanocarpa|JIMENEZMEJIAS||KHA|spm00003594* | Non-Himalayan | 0 | 1 | | 0 | 1 | |
| *Carex melanocephala|GEBAUER||ALT|spm00006156* | Non-Himalayan | 0 | 1 | | 0 | 1 | |
| *Carex melanostachya|STARR|B947b||spm00001550* | Non-Himalayan | 0 | 1 | | 0 | 1 | |
| *Carex membranacea|STARR|B442|ASK|spm00001050* | Non-Himalayan | 0 | 1 | | 0 | 1 | |
| *Carex mendocinensis|STARR|B1066|ORE|spm00001673* | Non-Himalayan | 0 | 1 | | 0 | 1 | |
| *Carex meridensis|STARR_FORD|STA_151|ECU|spm00005100* | Non-Himalayan | 0 | 1 | | 0 | 1 | |
| *Carex meridiana|SANGTAE|D0660|KOR?|spm00000338* | Non-Himalayan | 0 | 1 | | 0 | 1 | |
| *Carex merrittfernaldii|STARR|B443|MAN|spm00001051* | Non-Himalayan | 0 | 1 | | 0 | 1 | |
| *Carex mertensii|STARR|B448|ASK|spm00001056* | Non-Himalayan | 0 | 1 | | 0 | 1 | |
| *Carex mesochorea|STARR|B491|ALA|spm00001097* | Non-Himalayan | 0 | 1 | | 0 | 1 | |
| *Carex mesophila|REZNICEK|NA|MXE|spm00000364* | Non-Himalayan | 0 | 1 | | 0 | 1 | |
| *Carex meyeriana|GEBAUER||MON|spm00006158* | Non-Himalayan | 0 | 1 | | 0 | 1 | |
| *Carex michauxiana|STARR|B1141|MAN|spm00001748* | Non-Himalayan | 0 | 1 | | 0 | 1 | |
| *Carex michelii|MESTERHAZY|NA|HUN|spm00002175* | Non-Himalayan | 0 | 1 | | 0 | 1 | |
| *Carex micrantha|SANGTAE|E0333|KOR?|spm00000339* | Non-Himalayan | 0 | 1 | | 0 | 1 | |
| *Carex microcarpa|LUCENO|18E1MMR11|COR|spm00003759* | Non-Himalayan | 0 | 1 | | 0 | 1 | |
| *Carex microdonta|STARR|B817|MSI|spm00001420* | Non-Himalayan | 0 | 1 | | 0 | 1 | |
| *Carex microglochin|LUCENO|NA|GNL|spm00000590* | Both | 1 | 1 | | 1 | 1 | |
| *Carex micropoda|STARR|B1025|ARK|spm00001632* | Non-Himalayan | 0 | 1 | | 0 | 1 | |
| *Carex microptera|STARR|B316|NEV|spm00000934* | Non-Himalayan | 0 | 1 | | 0 | 1 | |
| *Carex mildbraediana|JIMENEZMEJIAS||BUR|spm00004361* | Non-Himalayan | 0 | 1 | | 0 | 1 | |
| *Carex minor|JIMENEZMEJIAS|||spm00004412* | Non-Himalayan | 0 | 1 | | 0 | 1 | |
| *Carex misera|STARR|B1157|TEN|spm00001764* | Non-Himalayan | 0 | 1 | | 0 | 1 | |
| *Carex missouriensis|STARR|B460|ILL|spm00001067* | Non-Himalayan | 0 | 1 | | 0 | 1 | |
| *Carex mitchelliana|STARR|B495|ALA|spm00001101* | Non-Himalayan | 0 | 1 | | 0 | 1 | |
| *Carex mitrata|XIAOFENG|NA|CHS|spm00000085* | Non-Himalayan | 0 | 1 | | 0 | 1 | |
| *Carex molesta|STARR|B463|DEL|spm00001070* | Non-Himalayan | 0 | 1 | | 0 | 1 | |
| *Carex molestiformis|STARR|B466|ARK|spm00001073* | Non-Himalayan | 0 | 1 | | 0 | 1 | |
| *Carex monostachya|GEHRKE|NA|KEN|spm00000211* | Non-Himalayan | 0 | 1 | | 0 | 1 | |
| *Carex monotropa|GEHRKE|NA|NAT|spm00000215* | Non-Himalayan | 0 | 1 | | 0 | 1 | |
| *Carex montana|LUCENO|NA|YUG|spm00000543* | Non-Himalayan | 0 | 1 | | 0 | 1 | |
| *Carex montis-everesti|JIMENEZMEJIAS||CHT|spm00003369* | Both | 1 | 1 | | 1 | 0 | |
| *Carex moorcroftii|JIMENEZMEJIAS||CHQ|spm00003370* | Both | 1 | 1 | | 1 | 0 | |
| *Carex morii|SANGTAE|F0014|KOR?|spm00000340* | Non-Himalayan | 0 | 1 | | 0 | 1 | |
| *Carex mossii|LUCENO|27E1MMR11|NAT|spm00003760* | Non-Himalayan | 0 | 1 | | 0 | 1 | |
| *Carex moupinensis|SHUREN|C_moupinensis_BHY||spm00003610* | Non-Himalayan | 0 | 1 | | 0 | 1 | |
| *Carex mucronata|LUCENO|NA|ITA|spm00000534* | Non-Himalayan | 0 | 1 | | 0 | 1 | |
| *Carex muehlenbergii|HIPP|muehlenbergii_3143|WIS|spm00002520* | Non-Himalayan | 0 | 1 | | 0 | 1 | |
| *Carex multicaulis|STARR|B486|CAL|spm00001092* | Non-Himalayan | 0 | 1 | | 0 | 1 | |
| *Carex multicostata|STARR|B487|CAL|spm00001093* | Non-Himalayan | 0 | 1 | | 0 | 1 | |
| *Carex multifaria|STARR_FORD||CLC|spm00005101* | Non-Himalayan | 0 | 1 | | 0 | 1 | |
| *Carex munda|JIMENEZMEJIAS||EHM|spm00003372* | Both | 1 | 1 | | 1 | 1 | |
| *Carex muriculata|STARR|B1203|NWM|spm00001810* | Non-Himalayan | 0 | 1 | | 0 | 1 | |
| *Carex muskingumensis|STARR|B509|MIC|spm00001115* | Non-Himalayan | 0 | 1 | | 0 | 1 | |
| *Carex myosuroides|STARR_FORD|STA_101|FRA|spm00005196* | Non-Himalayan | 0 | 1 | | 0 | 1 | |
| *Carex nakaoana|JIMENEZMEJIAS||CHT|spm00003374* | Both | 1 | 1 | | 1 | 0 | |
| *Carex nakasimae|SANGTAE|E0483|KOR?|spm00000341* | Non-Himalayan | 0 | 1 | | 0 | 1 | |
| *Carex nardina|STARR|B909|QUE|spm00001510* | Non-Himalayan | 0 | 1 | | 0 | 1 | |
| *Carex nebraskensis|STARR|B510|CAL|spm00001116* | Non-Himalayan | 0 | 1 | | 0 | 1 | |
| *Carex neesii|STARR_FORD|STA_6|EHM|spm00005194* | Both | 1 | 1 | | 1 | 0 | |
| *Carex negrii|JIMENEZMEJIAS||SOM|spm00003349* | Non-Himalayan | 0 | 1 | | 0 | 1 | |
| *Carex nelsonii|STARR|B1225|MNT|spm00001832* | Non-Himalayan | 0 | 1 | | 0 | 1 | |
| *Carex nemostachys|XIAOFENG|NA|CHS|spm00000088* | Non-Himalayan | 0 | 1 | | 0 | 1 | |
| *Carex nemurensis|WATERWAY|C.nemurensis_1963||spm00004619* | Non-Himalayan | 0 | 1 | | 0 | 1 | |
| *Carex neochevalieri|MESTERHAZY|NA|SIE|spm00002179* | Non-Himalayan | 0 | 1 | | 0 | 1 | |
| *Carex nervata|HIPP|NA|KOR|spm00000010* | Non-Himalayan | 0 | 1 | | 0 | 1 | |
| *Carex nervina|STARR|B1233|CAL|spm00001840* | Non-Himalayan | 0 | 1 | | 0 | 1 | |
| *Carex neurocarpa|HIPP|neurocarpa_2736|JAP|spm00002534* | Non-Himalayan | 0 | 1 | | 0 | 1 | |
| *Carex neurophora|STARR|B1008|WAS|spm00001615* | Non-Himalayan | 0 | 1 | | 0 | 1 | |
| *Carex nigerrima|JIMENEZMEJIAS|NA|PAK|spm00003469* | Himalayan | 1 | 0 | | 1 | 0 | |
| *Carex nigra|STARR|B894|NFL|spm00001495* | Both | 1 | 1 | | 1 | 1 | |
| *Carex nigricans|STARR|B1031|ARK|spm00001638* | Non-Himalayan | 0 | 1 | | 0 | 1 | |
| *Carex nigromarginata|STARR|B515|ARK|spm00001121* | Non-Himalayan | 0 | 1 | | 0 | 1 | |
| *Carex nivalis|JIMENEZMEJIAS||AFG|spm00003375* | Both | 1 | 1 | | 1 | 0 | |
| *Carex nodaeana|JIMENEZMEJIAS|NA|CHM|spm00003470* | Non-Himalayan | 0 | 1 | | 0 | 1 | |
| *Carex normalis|STARR|B451|ALA|spm00001059* | Non-Himalayan | 0 | 1 | | 0 | 1 | |
| *Carex norvegica|STARR|B1009|ORE|spm00001616* | Both | 1 | 1 | | 1 | 1 | |
| *Carex nova|STARR|B081|COL|spm00000700* | Non-Himalayan | 0 | 1 | | 0 | 1 | |
| *Carex novaeangliae|STARR|B453|MAI|spm00001061* | Non-Himalayan | 0 | 1 | | 0 | 1 | |
| *Carex nubigena|PAK|183085* | Both | 1 | 1 | | 1 | 1 | |
| *Carex nudata|STARR|B837|CAL|spm00001440* | Non-Himalayan | 0 | 1 | | 0 | 1 | |
| *Carex obispoensis|STARR|B1190|CAL|spm00001797* | Non-Himalayan | 0 | 1 | | 0 | 1 | |
| *Carex obliquicarpa|XIAOFENG|NA|CHS|spm00000089* | Non-Himalayan | 0 | 1 | | 0 | 1 | |
| *Carex obnupta|STARR|B499|CAL|spm00001105* | Non-Himalayan | 0 | 1 | | 0 | 1 | |
| *Carex obovatosquamata|CHC|E00666339* | Non-Himalayan | 0 | 1 | | 1 | 0 | |
| *Carex obscuriceps|EHM|E00693599* | Both | 1 | 1 | | 1 | 0 | |
| *Carex obtusata|STARR|B501|MAN|spm00001107* | Non-Himalayan | 0 | 1 | | 0 | 1 | |
| *Carex obtusifolia|JIMENEZMEJIAS|||spm00004428* | Non-Himalayan | 0 | 1 | | 0 | 1 | |
| *Carex occidentalis|REZNICEK|NA|MXC|spm00000282* | Non-Himalayan | 0 | 1 | | 0 | 1 | |
| *Carex oedipostyla|LUCENO|NA|SPA|spm00000587* | Non-Himalayan | 0 | 1 | | 0 | 1 | |
| *Carex oklahomensis|STARR|B505|ARK|spm00001111* | Non-Himalayan | 0 | 1 | | 0 | 1 | |
| *Carex olbiensis|LUCENO|NA|SPA|spm00000586* | Non-Himalayan | 0 | 1 | | 0 | 1 | |
| *Carex oligocarpa|STARR|B931|ARK|spm00001532* | Non-Himalayan | 0 | 1 | | 0 | 1 | |
| *Carex oligocarya|JIMENEZMEJIAS||PAK|spm00003395* | Himalayan | 1 | 0 | | 1 | 0 | |
| *Carex oligosperma|STARR|B506|NWH|spm00001112* | Non-Himalayan | 0 | 1 | | 0 | 1 | |
| *Carex opaca|STARR|B527|OKL|spm00001133* | Non-Himalayan | 0 | 1 | | 0 | 1 | |
| *Carex oreophila|JIMENEZMEJIAS|NA|TCS|spm00003471* | Non-Himalayan | 0 | 1 | | 0 | 1 | |
| *Carex orizabae|REZNICEK|NA|MXC|spm00000283* | Non-Himalayan | 0 | 1 | | 0 | 1 | |
| *Carex ormostachya|STARR|B528|MIC|spm00001134* | Non-Himalayan | 0 | 1 | | 0 | 1 | |
| *Carex ornithopoda|LUCENO|NA|YUG|spm00000560* | Non-Himalayan | 0 | 1 | | 0 | 1 | |
| *Carex oronensis|STARR|B1291|MAI|spm00001898* | Non-Himalayan | 0 | 1 | | 0 | 1 | |
| *Carex otrubae|JIMENEZMEJIAS|NA|SPA|spm00000559* | Non-Himalayan | 0 | 1 | | 1 | 1 | |
| *Carex ouachitana|STARR|B937|WAS|spm00001538* | Non-Himalayan | 0 | 1 | | 0 | 1 | |
| *Carex ovatispiculata|CHT|MSB-140867* | Non-Himalayan | 0 | 1 | | 1 | 1 | |
| *Carex ovoidispica|JIMENEZMEJIAS||PAK|spm00003406* | Himalayan | 1 | 0 | | 1 | 0 | |
| *Carex oxylepis|STARR|B531|KTY|spm00001137* | Non-Himalayan | 0 | 1 | | 0 | 1 | |
| *Carex ozarkana|HIPP|ozarkana_9357|ARK|spm00002557* | Non-Himalayan | 0 | 1 | | 0 | 1 | |
| *Carex pachygyna|WATERWAY|pachygyna_1828|JAP|spm00002558* | Non-Himalayan | 0 | 1 | | 0 | 1 | |
| *Carex pachystachya|STARR|B1257|ARK|spm00001864* | Non-Himalayan | 0 | 1 | | 0 | 1 | |
| *Carex pachystylis|JIMENEZMEJIAS|NA|UZB|spm00003472* | Non-Himalayan | 0 | 1 | | 0 | 1 | |
| *Carex paeninsulae|STARR|B842|FLA|spm00001445* | Non-Himalayan | 0 | 1 | | 0 | 1 | |
| *Carex pairae|JIMENEZMEJIAS||SPA|spm00004401* | Non-Himalayan | 0 | 1 | | 0 | 1 | |
| *Carex paleacea|STARR|B521|MAI|spm00001127* | Non-Himalayan | 0 | 1 | | 0 | 1 | |
| *Carex pallescens|STARR|B1401|BRC|spm00002008* | Non-Himalayan | 0 | 1 | | 0 | 1 | |
| *Carex pallidula|JIMENEZMEJIAS||FIN|spm00004388* | Non-Himalayan | 0 | 1 | | 0 | 1 | |
| *Carex paneroi|REZNICEK|NA|MXS|spm00000363* | Non-Himalayan | 0 | 1 | | 0 | 1 | |
| *Carex panicea|STARR|B1299|MAI|spm00001906* | Non-Himalayan | 0 | 1 | | 0 | 1 | |
| *Carex paniculata|MAGUILLA|||spm00006108* | Non-Himalayan | 0 | 1 | | 0 | 1 | |
| *Carex panormitana|LUCENO|22E2SMB13|SAR|spm00003779* | Non-Himalayan | 0 | 1 | | 0 | 1 | |
| *Carex pansa|STARR|B1357|CAL|spm00001964* | Non-Himalayan | 0 | 1 | | 0 | 1 | |
| *Carex papulosa|HIPP|NA|KOR|spm00000016* | Non-Himalayan | 0 | 1 | | 0 | 1 | |
| *Carex parallela|JIMENEZMEJIAS||FIN|spm00003596* | Non-Himalayan | 0 | 1 | | 0 | 1 | |
| *Carex parryana|STARR|B1027|ARK|spm00001634* | Non-Himalayan | 0 | 1 | | 0 | 1 | |
| *Carex parva|STARR_FORD||CHC|spm00005212* | Both | 1 | 1 | | 1 | 1 | |
| *Carex parviflora|LUCENO|NA|SWI|spm00000544* | Non-Himalayan | 0 | 1 | | 0 | 1 | |
| *Carex parvispica|JIMENEZMEJIAS|||spm00004427* | Non-Himalayan | 0 | 1 | | 0 | 1 | |
| *Carex parvula|SHUREN|K_pygmaea_ZSR_K||spm00003646* | Both | 1 | 1 | | 1 | 1 | |
| *Carex pauciflora|STARR|B536|ARK|spm00001142* | Non-Himalayan | 0 | 1 | | 0 | 1 | |
| *Carex paulovargasii|JIMENEZMEJIAS||MOR|spm00004349* | Non-Himalayan | 0 | 1 | | 0 | 1 | |
| *Carex paysonis|JIMENEZMEJIAS||ORE|spm00004437* | Non-Himalayan | 0 | 1 | | 0 | 1 | |
| *Carex peckii|STARR|B1018|ARK|spm00001625* | Non-Himalayan | 0 | 1 | | 0 | 1 | |
| *Carex pediformis|JIMENEZMEJIAS||CHC|spm00003390* | Non-Himalayan | 0 | 1 | | 0 | 1 | |
| *Carex pedunculata|STARR|B541|MAS|spm00001147* | Non-Himalayan | 0 | 1 | | 0 | 1 | |
| *Carex peichuniana|SHUREN|K_inflata_LJQ||spm00003638* | Both | 1 | 1 | | 1 | 0 | |
| *Carex pellita|STARR|B542|CAL|spm00001148* | Non-Himalayan | 0 | 1 | | 0 | 1 | |
| *Carex pelocarpa|STARR|B589|NEV|spm00001195* | Non-Himalayan | 0 | 1 | | 0 | 1 | |
| *Carex pendula|STARR|B591|AUT|spm00001197* | Non-Himalayan | 0 | 1 | | 0 | 1 | |
| *Carex pensylvanica|STARR|B565|MAN|spm00001171* | Non-Himalayan | 0 | 1 | | 0 | 1 | |
| *Carex perdentata|STARR|B585|TEX|spm00001191* | Non-Himalayan | 0 | 1 | | 0 | 1 | |
| *Carex peregrina|LUCENO|NA|MDR|spm00000564* | Non-Himalayan | 0 | 1 | | 0 | 1 | |
| *Carex perglobosa|STARR|B1196|COL|spm00001803* | Non-Himalayan | 0 | 1 | | 0 | 1 | |
| *Carex perplexa|JIMENEZMEJIAS|||spm00004409* | Non-Himalayan | 0 | 1 | | 0 | 1 | |
| *Carex perraudieriana|JIMENEZMEJIAS||CNY|spm00004346* | Non-Himalayan | 0 | 1 | | 0 | 1 | |
| *Carex perstricta|REZNICEK|NA|MXS|spm00000359* | Non-Himalayan | 0 | 1 | | 0 | 1 | |
| *Carex petasata|STARR|B586|UTA|spm00001192* | Non-Himalayan | 0 | 1 | | 0 | 1 | |
| *Carex petitiana|GEHRKE|NA|MLW|spm00000219* | Non-Himalayan | 0 | 1 | | 0 | 1 | |
| *Carex peucophila|JIMENEZMEJIAS|NA|COS|spm00000516* | Non-Himalayan | 0 | 1 | | 0 | 1 | |
| *Carex phaeocephala|STARR|B587|NEV|spm00001193* | Non-Himalayan | 0 | 1 | | 0 | 1 | |
| *Carex phleoides|STARR_FORD||CLC|spm00005103* | Non-Himalayan | 0 | 1 | | 0 | 1 | |
| *Carex phragmitoides|GEHRKE|NA|ETH|spm00000221* | Non-Himalayan | 0 | 1 | | 0 | 1 | |
| *Carex phyllostachys|STARR_FORD||TUR|spm00005164* | Non-Himalayan | 0 | 1 | | 0 | 1 | |
| *Carex physodes|STARR_FORD|STA_849|TZK|spm00005427* | Non-Himalayan | 0 | 1 | | 1 | 1 | |
| *Carex pichinchensis|LUCENO|NA|ECU|spm00000538* | Non-Himalayan | 0 | 1 | | 0 | 1 | |
| *Carex picta|STARR|B553|GEO|spm00001159* | Non-Himalayan | 0 | 1 | | 0 | 1 | |
| *Carex pigra|STARR|B1178|MSI|spm00001785* | Non-Himalayan | 0 | 1 | | 0 | 1 | |
| *Carex pilosa|LUCENO|NA|YUG|spm00000563* | Non-Himalayan | 0 | 1 | | 0 | 1 | |
| *Carex pilulifera|LUCENO|NA|POR|spm00000583* | Non-Himalayan | 0 | 1 | | 0 | 1 | |
| *Carex pinophila|REZNICEK|NA|MXE|spm00000284* | Non-Himalayan | 0 | 1 | | 0 | 1 | |
| *Carex pisiformis|XIAOFENG|NA|CHS|spm00000095* | Non-Himalayan | 0 | 1 | | 0 | 1 | |
| *Carex pityophila|STARR|B1223|NWM|spm00001830* | Non-Himalayan | 0 | 1 | | 0 | 1 | |
| *Carex planata|STARR_FORD|STA_850|JAP|spm00005429* | Non-Himalayan | 0 | 1 | | 0 | 1 | |
| *Carex planilomina|REZNICEK|NA|MXE|spm00000365* | Non-Himalayan | 0 | 1 | | 0 | 1 | |
| *Carex planispicata|STARR|B047|MRY|spm00000666* | Non-Himalayan | 0 | 1 | | 0 | 1 | |
| *Carex planostachys|STARR|B544|TEX|spm00001150* | Non-Himalayan | 0 | 1 | | 0 | 1 | |
| *Carex plantaginea|STARR|B1286|TEN|spm00001893* | Non-Himalayan | 0 | 1 | | 0 | 1 | |
| *Carex platyphylla|STARR|B546|MRY|spm00001152* | Non-Himalayan | 0 | 1 | | 0 | 1 | |
| *Carex plectobasis|JIMENEZMEJIAS||CHT|spm00003378* | Both | 1 | 1 | | 1 | 0 | |
| *Carex pleiostachys|JIMENEZMEJIAS|||spm00004408* | Non-Himalayan | 0 | 1 | | 0 | 1 | |
| *Carex pluriflora|STARR|B1349|ARK|spm00001956* | Non-Himalayan | 0 | 1 | | 0 | 1 | |
| *Carex podocarpa|STARR|B1325|BRC|spm00001932* | Non-Himalayan | 0 | 1 | | 0 | 1 | |
| *Carex polymorpha|STARR|B1300|MAI|spm00001907* | Non-Himalayan | 0 | 1 | | 0 | 1 | |
| *Carex polyschoenoides|XIAOFENG|NA|CHN|spm00000096* | Non-Himalayan | 0 | 1 | | 0 | 1 | |
| *Carex polystachya|STARR_FORD|STA_210|BLZ|spm00005148* | Non-Himalayan | 0 | 1 | | 0 | 1 | |
| *Carex polysticha|REZNICEK|NA|DOM|spm00000292* | Non-Himalayan | 0 | 1 | | 0 | 1 | |
| *Carex pomiensis|JIMENEZMEJIAS||CHT|spm00003352* | Both | 1 | 1 | | 1 | 0 | |
| *Carex potens|JIMENEZMEJIAS|||spm00004430* | Non-Himalayan | 0 | 1 | | 0 | 1 | |
| *Carex potosina|HIPP|potosina_sn|MXE|spm00002588* | Non-Himalayan | 0 | 1 | | 0 | 1 | |
| *Carex praeceptorium|STARR|B1345|CAL|spm00001952* | Non-Himalayan | 0 | 1 | | 0 | 1 | |
| *Carex praeclara|JIMENEZMEJIAS||CHT|spm00003379* | Himalayan | 1 | 0 | | 1 | 0 | |
| *Carex praecox|MESTERHAZY|NA|HUN|spm00002176* | Non-Himalayan | 0 | 1 | | 0 | 1 | |
| *Carex praegracilis|STARR|B551|CAL|spm00001157* | Non-Himalayan | 0 | 1 | | 0 | 1 | |
| *Carex prainii|EHM|E00256786* | Both | 1 | 1 | | 1 | 0 | |
| *Carex prairea|STARR|B1344|BRC|spm00001951* | Non-Himalayan | 0 | 1 | | 0 | 1 | |
| *Carex prasina|STARR|B560|GEO|spm00001166* | Non-Himalayan | 0 | 1 | | 0 | 1 | |
| *Carex praticola|STARR|B557|COL|spm00001163* | Non-Himalayan | 0 | 1 | | 0 | 1 | |
| *Carex preslii|STARR|B568|ORE|spm00001174* | Non-Himalayan | 0 | 1 | | 0 | 1 | |
| *Carex pringlei|REZNICEK|NA|MXE|spm00000293* | Non-Himalayan | 0 | 1 | | 0 | 1 | |
| *Carex projecta|STARR|B570|MAN|spm00001176* | Non-Himalayan | 0 | 1 | | 0 | 1 | |
| *Carex proposita|STARR|B1334|CAL|spm00001941* | Non-Himalayan | 0 | 1 | | 0 | 1 | |
| *Carex proxima|GEHRKE|NA|MDG|spm00000222* | Non-Himalayan | 0 | 1 | | 0 | 1 | |
| *Carex pruinosa|CHC|E00263657* | Both | 1 | 1 | | 1 | 1 | |
| *Carex pseudobicolor|JIMENEZMEJIAS||PAK|spm00003380* | Both | 1 | 1 | | 1 | 0 | |
| *Carex pseudobrizoides|MESTERHAZY|NA|POL|spm00002177* | Non-Himalayan | 0 | 1 | | 0 | 1 | |
| *Carex pseudochinensis|SANGTAE|E0479|KOR?|spm00000346* | Non-Himalayan | 0 | 1 | | 0 | 1 | |
| *Carex pseudocuraica|HIPP|pseudocuraica_668|CH?|spm00002605* | Non-Himalayan | 0 | 1 | | 0 | 1 | |
| *Carex pseudocyperus|STARR|B573|MIC|spm00001179* | Both | 1 | 1 | | 1 | 1 | |
| *Carex pseudofoetida|PAK|183071* | Both | 1 | 1 | | 1 | 1 | |
| *Carex pseudogammiei|SHUREN|K_loliacea_LJQ||spm00003639* | Both | 1 | 1 | | 1 | 0 | |
| *Carex pseudolaxa|PAK|183107* | Both | 1 | 1 | | 1 | 0 | |
| *Carex pseudololiacea|MAGUILLA|||spm00006080* | Non-Himalayan | 0 | 1 | | 0 | 1 | |
| *Carex pseudorufa|LUCENO|||spm00003250* | Non-Himalayan | 0 | 1 | | 0 | 1 | |
| *Carex pseudotristachya|XIAOFENG|NA|CHS|spm00000098* | Non-Himalayan | 0 | 1 | | 0 | 1 | |
| *Carex pseuduncinoides|SHUREN|K_kansuensis_ZSR_K||spm00003619* | Both | 1 | 1 | | 1 | 1 | |
| *Carex pterocarpa|JIMENEZMEJIAS|||spm00004425* | Non-Himalayan | 0 | 1 | | 0 | 1 | |
| *Carex pulchra|EHM|E00693608* | Both | 1 | 1 | | 1 | 0 | |
| *Carex pulicaris|STARR_FORD||GRB|spm00005180* | Non-Himalayan | 0 | 1 | | 0 | 1 | |
| *Carex pumila|STARR|B1461|NCA|spm00002067* | Non-Himalayan | 0 | 1 | | 0 | 1 | |
| *Carex punctata|JIMENEZMEJIAS||MOR|spm00004350* | Non-Himalayan | 0 | 1 | | 0 | 1 | |
| *Carex punicea|STARR_FORD|STA_72|NZS|spm00005105* | Non-Himalayan | 0 | 1 | | 0 | 1 | |
| *Carex purpurata|JIMENEZMEJIAS|||spm00004431* | Non-Himalayan | 0 | 1 | | 0 | 1 | |
| *Carex purpurifera|STARR|B867|KTY|spm00001470* | Non-Himalayan | 0 | 1 | | 0 | 1 | |
| *Carex pycnostachys|JIMENEZMEJIAS||AFG|spm00003389* | Non-Himalayan | 0 | 1 | | 0 | 1 | |
| *Carex pyramidalis|GEHRKE|NA|MDG|spm00000223* | Non-Himalayan | 0 | 1 | | 0 | 1 | |
| *Carex pyrenaica|LUCENO|NA|SPA|spm00000582* | Non-Himalayan | 0 | 1 | | 0 | 1 | |
| *Carex qiyunensis|XIAOFENG|NA|CHS|spm00000102* | Non-Himalayan | 0 | 1 | | 0 | 1 | |
| *Carex quadriflora|SANGTAE|E0482|KOR?|spm00000347* | Non-Himalayan | 0 | 1 | | 0 | 1 | |
| *Carex queretarensis|REZNICEK|NA|MXE|spm00000294* | Non-Himalayan | 0 | 1 | | 0 | 1 | |
| *Carex raddei|HIPP|NA|KOR|spm00000007* | Non-Himalayan | 0 | 1 | | 0 | 1 | |
| *Carex radfordii|STARR|B835|SCA|spm00001438* | Non-Himalayan | 0 | 1 | | 0 | 1 | |
| *Carex radiata|STARR|B592|MIC|spm00001198* | Non-Himalayan | 0 | 1 | | 0 | 1 | |
| *Carex radicalis|EHM|E00693596* | Both | 1 | 1 | | 1 | 0 | |
| *Carex rainbowii|LUCENO||NAT|spm00003255* | Non-Himalayan | 0 | 1 | | 0 | 1 | |
| *Carex ramenskii|STARR|B836|ARK|spm00001439* | Non-Himalayan | 0 | 1 | | 0 | 1 | |
| *Carex ramosa|HIPP|NA|REU|spm00002208* | Non-Himalayan | 0 | 1 | | 0 | 1 | |
| *Carex randalpina|LUCENO||AUT|spm00003098* | Non-Himalayan | 0 | 1 | | 0 | 1 | |
| *Carex rariflora|STARR|B1392|YUK|spm00001999* | Non-Himalayan | 0 | 1 | | 0 | 1 | |
| *Carex raynoldsii|STARR|B578|CAL|spm00001184* | Non-Himalayan | 0 | 1 | | 0 | 1 | |
| *Carex remota|MAGUILLA|||spm00006117* | Both | 1 | 1 | | 1 | 1 | |
| *Carex remotiuscula|HIPP|remotiuscula_431|CHC|spm00002615* | Non-Himalayan | 0 | 1 | | 1 | 1 | |
| *Carex renauldii|GEHRKE|NA|MDG|spm00000224* | Non-Himalayan | 0 | 1 | | 0 | 1 | |
| *Carex reniformis|STARR|B581|GEO|spm00001187* | Non-Himalayan | 0 | 1 | | 0 | 1 | |
| *Carex renschiana|HIPP|NA|MDG|spm00002207* | Non-Himalayan | 0 | 1 | | 0 | 1 | |
| *Carex resectans|WATERWAY|resectans_1644|NZN|spm00002618* | Non-Himalayan | 0 | 1 | | 0 | 1 | |
| *Carex retroflexa|STARR|B584|DEL|spm00001190* | Non-Himalayan | 0 | 1 | | 0 | 1 | |
| *Carex retrorsa|STARR|B603|MIC|spm00001210* | Non-Himalayan | 0 | 1 | | 0 | 1 | |
| *Carex reznicekii|STARR|B605|ALA|spm00001212* | Non-Himalayan | 0 | 1 | | 0 | 1 | |
| *Carex rhizina|MESTERHAZY|NA|AUT|spm00002182* | Non-Himalayan | 0 | 1 | | 0 | 1 | |
| *Carex rhodesiaca|GEHRKE|Carex MOR_318||spm00004696* | Non-Himalayan | 0 | 1 | | 0 | 1 | |
| *Carex rhynchoperigynium|REZNICEK|NA|MXE|spm00000295* | Non-Himalayan | 0 | 1 | | 0 | 1 | |
| *Carex richardsonii|STARR|B613|MRY|spm00001220* | Non-Himalayan | 0 | 1 | | 0 | 1 | |
| *Carex riloensis|JIMENEZMEJIAS||BUL|spm00003599* | Non-Himalayan | 0 | 1 | | 0 | 1 | |
| *Carex rivulorum|SHUREN|C_hangzhouensis_BHY||spm00003604* | Non-Himalayan | 0 | 1 | | 0 | 1 | |
| *Carex roanensis|STARR|B617|NCA|spm00001224* | Non-Himalayan | 0 | 1 | | 0 | 1 | |
| *Carex rochebrunii|STARR_FORD||CHS|spm00005431* | Both | 1 | 1 | | 1 | 1 | |
| *Carex rorulenta|JIMENEZMEJIAS|NA|BAL|spm00003474* | Non-Himalayan | 0 | 1 | | 0 | 1 | |
| *Carex rosea|STARR|B607|MAI|spm00001214* | Non-Himalayan | 0 | 1 | | 0 | 1 | |
| *Carex rossii|STARR|B595|CAL|spm00001201* | Non-Himalayan | 0 | 1 | | 0 | 1 | |
| *Carex rostrata|STARR|B993|WAS|spm00001600* | Both | 1 | 1 | | 1 | 1 | |
| *Carex rotundata|STARR|B1142|MAN|spm00001749* | Non-Himalayan | 0 | 1 | | 0 | 1 | |
| *Carex rubicunda|JIMENEZMEJIAS|||spm00004423* | Non-Himalayan | 0 | 1 | | 0 | 1 | |
| *Carex rufulistolon|EHM|E00424592* | Himalayan | 1 | 0 | | 1 | 0 | |
| *Carex rugulosa|SANGTAE|E0485|KOR?|spm00000348* | Non-Himalayan | 0 | 1 | | 0 | 1 | |
| *Carex runssoroensis|GEHRKE|NA|UGA|spm00000227* | Non-Himalayan | 0 | 1 | | 0 | 1 | |
| *Carex rupestris|STARR_FORD|STA_102|FRA|spm00005213* | Non-Himalayan | 0 | 1 | | 0 | 1 | |
| *Carex rutenbergiana|GEHRKE|NA|MDG|spm00000228* | Non-Himalayan | 0 | 1 | | 0 | 1 | |
| *Carex ruthii|STARR|B600a|NCA|spm00001206* | Non-Himalayan | 0 | 1 | | 0 | 1 | |
| *Carex sabulosa|STARR|B1039|YUK|spm00001646* | Non-Himalayan | 0 | 1 | | 0 | 1 | |
| *Carex sagei|LUCENO|NA|AGS|spm00000548* | Non-Himalayan | 0 | 1 | | 0 | 1 | |
| *Carex salina|STARR|B1346|QUE|spm00001953* | Non-Himalayan | 0 | 1 | | 0 | 1 | |
| *Carex salticola|LUCENO|NA|AGS|spm00000581* | Non-Himalayan | 0 | 1 | | 0 | 1 | |
| *Carex sanguinea|PAK|183075* | Both | 1 | 1 | | 1 | 0 | |
| *Carex sargentiana|JIMENEZMEJIAS||CHT|spm00003408* | Non-Himalayan | 0 | 1 | | 1 | 1 | |
| *Carex sartwelliana|STARR|B1191|CAL|spm00001798* | Non-Himalayan | 0 | 1 | | 0 | 1 | |
| *Carex sartwellii|STARR|B1375|BRC|spm00001982* | Non-Himalayan | 0 | 1 | | 0 | 1 | |
| *Carex saxatilis|STARR|B616|UTA|spm00001223* | Non-Himalayan | 0 | 1 | | 0 | 1 | |
| *Carex saximontana|STARR|B1120|COL|spm00001727* | Non-Himalayan | 0 | 1 | | 0 | 1 | |
| *Carex scabrata|STARR|B636|GEO|spm00001243* | Non-Himalayan | 0 | 1 | | 0 | 1 | |
| *Carex scabriuscula|STARR|B639|CAL|spm00001246* | Non-Himalayan | 0 | 1 | | 0 | 1 | |
| *Carex scaposa|SHUREN|C_scaposa_BHY||spm00003611* | Non-Himalayan | 0 | 1 | | 0 | 1 | |
| *Carex schiedeana|REZNICEK|NA|MXG|spm00000354* | Non-Himalayan | 0 | 1 | | 0 | 1 | |
| *Carex schimperiana|LUCENO|||spm00003249* | Non-Himalayan | 0 | 1 | | 0 | 1 | |
| *Carex schlagintweitiana|PAK|183068* | Both | 1 | 1 | | 1 | 0 | |
| *Carex schottii|STARR|B1074|CAL|spm00001681* | Non-Himalayan | 0 | 1 | | 0 | 1 | |
| *Carex schweickerdtii|GEHRKE|NA|NAT|spm00000160* | Non-Himalayan | 0 | 1 | | 0 | 1 | |
| *Carex schweinitzii|STARR|B649|MIC|spm00001256* | Non-Himalayan | 0 | 1 | | 0 | 1 | |
| *Carex scirpoidea|STARR_FORD|STA_180|ABT|spm00005153* | Non-Himalayan | 0 | 1 | | 0 | 1 | |
| *Carex senanensis|STARR_FORD|STA_863|MAN|spm00005371* | Non-Himalayan | 0 | 1 | | 0 | 1 | |
| *Carex senta|STARR|B1278|ARI|spm00001885* | Non-Himalayan | 0 | 1 | | 0 | 1 | |
| *Carex seorsa|STARR|B635|DEL|spm00001242* | Non-Himalayan | 0 | 1 | | 0 | 1 | |
| *Carex serpenticola|STARR|B1354|CAL|spm00001961* | Non-Himalayan | 0 | 1 | | 0 | 1 | |
| *Carex serratodens|STARR|B619|CAL|spm00001226* | Non-Himalayan | 0 | 1 | | 0 | 1 | |
| *Carex setschwanensis|SHUREN|K_setschwanensis_ZSR_K||spm00003620* | Non-Himalayan | 0 | 1 | | 1 | 1 | |
| *Carex shangchengensis|XIAOFENG|NA|CHS|spm00000071* | Non-Himalayan | 0 | 1 | | 0 | 1 | |
| *Carex sheldonii|STARR|B1086|CAL|spm00001693* | Non-Himalayan | 0 | 1 | | 0 | 1 | |
| *Carex shinnersii|STARR|B618|TEN|spm00001225* | Non-Himalayan | 0 | 1 | | 0 | 1 | |
| *Carex shortiana|STARR|B622|KTY|spm00001229* | Non-Himalayan | 0 | 1 | | 0 | 1 | |
| *Carex siccata|STARR|B1464|ONT|spm00002070* | Non-Himalayan | 0 | 1 | | 0 | 1 | |
| *Carex siderosticta|WATERWAY|siderosticta_1837|JAP|spm00002643* | Non-Himalayan | 0 | 1 | | 0 | 1 | |
| *Carex silicea|STARR|B625|DEL|spm00001232* | Non-Himalayan | 0 | 1 | | 0 | 1 | |
| *Carex silvestris|JIMENEZMEJIAS|||spm00004421* | Non-Himalayan | 0 | 1 | | 0 | 1 | |
| *Carex simensis|JIMENEZMEJIAS||KEN|spm00004374* | Non-Himalayan | 0 | 1 | | 0 | 1 | |
| *Carex simpliciuscula|JIMENEZMEJIAS||CHT|spm00003402* | Non-Himalayan | 0 | 1 | | 1 | 1 | |
| *Carex simulans|SHUREN|C_simulans_BHY||spm00003605* | Non-Himalayan | 0 | 1 | | 0 | 1 | |
| *Carex simulata|STARR|B678|CAL|spm00001284* | Non-Himalayan | 0 | 1 | | 0 | 1 | |
| *Carex socialis|STARR|B682|ALA|spm00001288* | Non-Himalayan | 0 | 1 | | 0 | 1 | |
| *Carex songorica|JIMENEZMEJIAS||TZK|spm00003384* | Both | 1 | 1 | | 1 | 1 | |
| *Carex sorianoi|LUCENO|NA|AGS|spm00000542* | Non-Himalayan | 0 | 1 | | 0 | 1 | |
| *Carex sororia|STARR_FORD|STA_868|PAR|spm00005362* | Non-Himalayan | 0 | 1 | | 0 | 1 | |
| *Carex sparganioides|STARR|B683|DEL|spm00001289* | Non-Himalayan | 0 | 1 | | 0 | 1 | |
| *Carex spartea|STARR_FORD|STA_50|OFS|spm00005206* | Non-Himalayan | 0 | 1 | | 0 | 1 | |
| *Carex specifica|STARR|B686|CAL|spm00001292* | Non-Himalayan | 0 | 1 | | 0 | 1 | |
| *Carex spectabilis|STARR|B1372|BRC|spm00001979* | Non-Himalayan | 0 | 1 | | 0 | 1 | |
| *Carex specuicola|STARR|B1207|ARI|spm00001814* | Non-Himalayan | 0 | 1 | | 0 | 1 | |
| *Carex sphaerogyna|GEHRKE|NA|MDG|spm00000237* | Non-Himalayan | 0 | 1 | | 0 | 1 | |
| *Carex spicata|STARR|B666|BUL|spm00001272* | Non-Himalayan | 0 | 1 | | 0 | 1 | |
| *Carex spissa|REZNICEK|NA|MXE|spm00000296* | Non-Himalayan | 0 | 1 | | 0 | 1 | |
| *Carex sprengelii|STARR|B1159|NBR|spm00001766* | Non-Himalayan | 0 | 1 | | 0 | 1 | |
| *Carex squarrosa|STARR|B675|ARK|spm00001281* | Non-Himalayan | 0 | 1 | | 0 | 1 | |
| *Carex stellata|REZNICEK|NA|MXE|spm00000360* | Non-Himalayan | 0 | 1 | | 0 | 1 | |
| *Carex stenocarpa|JIMENEZMEJIAS||CHC|spm00003385* | Both | 1 | 1 | | 1 | 1 | |
| *Carex stenophylla|JIMENEZMEJIAS||TCS|spm00003603* | Both | 1 | 1 | | 1 | 1 | |
| *Carex stenoptila|STARR|B676|UTA|spm00001282* | Non-Himalayan | 0 | 1 | | 0 | 1 | |
| *Carex sterilis|STARR|B1136|MAN|spm00001743* | Non-Himalayan | 0 | 1 | | 0 | 1 | |
| *Carex steudneri|GEHRKE|Carex MOR_909||spm00004702* | Non-Himalayan | 0 | 1 | | 0 | 1 | |
| *Carex stevenii|STARR|B1103|COL|spm00001710* | Non-Himalayan | 0 | 1 | | 0 | 1 | |
| *Carex stipata|STARR_FORD|STA_873|MRY|spm00005444* | Non-Himalayan | 0 | 1 | | 0 | 1 | |
| *Carex straminea|STARR|B645|DEL|spm00001252* | Non-Himalayan | 0 | 1 | | 0 | 1 | |
| *Carex straminiformis|STARR|B660|UTA|spm00001266* | Non-Himalayan | 0 | 1 | | 0 | 1 | |
| *Carex striata|STARR|B668|FLA|spm00001274* | Non-Himalayan | 0 | 1 | | 0 | 1 | |
| *Carex striatula|STARR|B658|DEL|spm00001264* | Non-Himalayan | 0 | 1 | | 0 | 1 | |
| *Carex stricta|STARR|B690|TEX|spm00001296* | Non-Himalayan | 0 | 1 | | 0 | 1 | |
| *Carex strictissima|JIMENEZMEJIAS||NZS|spm00004413* | Non-Himalayan | 0 | 1 | | 0 | 1 | |
| *Carex strigosa|LUCENO|||spm00003302* | Non-Himalayan | 0 | 1 | | 0 | 1 | |
| *Carex styloflexa|STARR|B693|GEO|spm00001299* | Non-Himalayan | 0 | 1 | | 0 | 1 | |
| *Carex stylosa|STARR|B889|NFL|spm00001490* | Non-Himalayan | 0 | 1 | | 0 | 1 | |
| *Carex subbracteata|STARR|B1348|CAL|spm00001955* | Non-Himalayan | 0 | 1 | | 0 | 1 | |
| *Carex subebracteata|XIAOFENG|NA|CHI|spm00000121* | Non-Himalayan | 0 | 1 | | 0 | 1 | |
| *Carex suberecta|STARR|B953|ARK|spm00001559* | Non-Himalayan | 0 | 1 | | 0 | 1 | |
| *Carex subfusca|HIPP|NA|ARI|spm00000307* | Non-Himalayan | 0 | 1 | | 0 | 1 | |
| *Carex subnigricans|STARR|B1067|ORE|spm00001674* | Non-Himalayan | 0 | 1 | | 0 | 1 | |
| *Carex subphysodes|JIMENEZMEJIAS|NA|AFG|spm00003477* | Non-Himalayan | 0 | 1 | | 0 | 1 | |
| *Carex subsacculata|STARR_FORD|STA_147|ECU|spm00005108* | Non-Himalayan | 0 | 1 | | 0 | 1 | |
| *Carex subspathacea|STARR|B1040|ARK|spm00001647* | Non-Himalayan | 0 | 1 | | 0 | 1 | |
| *Carex subtilis|JIMENEZMEJIAS|||spm00004415* | Non-Himalayan | 0 | 1 | | 0 | 1 | |
| *Carex subviridis|JIMENEZMEJIAS|||spm00004429* | Non-Himalayan | 0 | 1 | | 0 | 1 | |
| *Carex suifunensis|SANGTAE|E0525|KOR?|spm00000350* | Non-Himalayan | 0 | 1 | | 0 | 1 | |
| *Carex superata|STARR|B012|KTY|spm00000632* | Non-Himalayan | 0 | 1 | | 0 | 1 | |
| *Carex swanii|STARR|B699|ARK|spm00001304* | Non-Himalayan | 0 | 1 | | 0 | 1 | |
| *Carex sychnocephala|STARR|B1293|ONT|spm00001900* | Non-Himalayan | 0 | 1 | | 0 | 1 | |
| *Carex sylvatica|STARR|B983|WAS|spm00001590* | Non-Himalayan | 0 | 1 | | 0 | 1 | |
| *Carex tahoensis|STARR|B1068|ORE|spm00001675* | Non-Himalayan | 0 | 1 | | 0 | 1 | |
| *Carex tangulashanensis|JIMENEZMEJIAS||CHQ|spm00003591* | Non-Himalayan | 0 | 1 | | 1 | 1 | |
| *Carex tapintzensis|JIMENEZMEJIAS||CHT|spm00003393* | Non-Himalayan | 0 | 1 | | 1 | 0 | |
| *Carex tasmanica|JIMENEZMEJIAS||TAS|spm00004362* | Non-Himalayan | 0 | 1 | | 0 | 1 | |
| *Carex tenax|STARR|B703|LOU|spm00001308* | Non-Himalayan | 0 | 1 | | 0 | 1 | |
| *Carex tenera|HIPP|tenera_3124|WIS|spm00002701* | Non-Himalayan | 0 | 1 | | 0 | 1 | |
| *Carex teneriformis|HIPP|teneraeformis_716|CAL|spm00002704* | Non-Himalayan | 0 | 1 | | 0 | 1 | |
| *Carex tenuiflora|STARR|B708|MAN|spm00001313* | Non-Himalayan | 0 | 1 | | 0 | 1 | |
| *Carex tetanica|STARR|B709|MAN|spm00001314* | Non-Himalayan | 0 | 1 | | 0 | 1 | |
| *Carex tetrastachya|STARR|B663|TEX|spm00001269* | Non-Himalayan | 0 | 1 | | 0 | 1 | |
| *Carex texensis|STARR_FORD||TEN|spm00005419* | Non-Himalayan | 0 | 1 | | 0 | 1 | |
| *Carex thornei|STARR|B040|FLA|spm00000659* | Non-Himalayan | 0 | 1 | | 0 | 1 | |
| *Carex thurberi|STARR|B1209|ARI|spm00001816* | Non-Himalayan | 0 | 1 | | 0 | 1 | |
| *Carex tibetikobresia|SHUREN|K_capilifolia_ZSR_K||spm00003617* | Non-Himalayan | 0 | 1 | | 1 | 1 | |
| *Carex timida|STARR|B005|ALA|spm00000625* | Non-Himalayan | 0 | 1 | | 0 | 1 | |
| *Carex tincta|STARR|B737|MAI|spm00001342* | Non-Himalayan | 0 | 1 | | 0 | 1 | |
| *Carex tomentosa|LUCENO|NA|SPA|spm00000568* | Non-Himalayan | 0 | 1 | | 0 | 1 | |
| *Carex tonsa|STARR|B712||spm00001317* | Non-Himalayan | 0 | 1 | | 0 | 1 | |
| *Carex torreyi|STARR|B1101|COL|spm00001708* | Non-Himalayan | 0 | 1 | | 0 | 1 | |
| *Carex torta|STARR|B715|PEN|spm00001320* | Non-Himalayan | 0 | 1 | | 0 | 1 | |
| *Carex trachycarpa|WATERWAY|trachycarpa_3523||spm00002713* | Non-Himalayan | 0 | 1 | | 0 | 1 | |
| *Carex traiziscana|MAGUILLA|||spm00004625* | Non-Himalayan | 0 | 1 | | 0 | 1 | |
| *Carex transandina|LUCENO|NA|AGS|spm00000554* | Non-Himalayan | 0 | 1 | | 0 | 1 | |
| *Carex transcaucasica|LUCENO||Iran|spm00003280* | Non-Himalayan | 0 | 1 | | 0 | 1 | |
| *Carex traversii|K_FORD|NA|NZS|spm00002187* | Non-Himalayan | 0 | 1 | | 0 | 1 | |
| *Carex triangula|STARR_FORD||AGS|spm00005218* | Non-Himalayan | 0 | 1 | | 0 | 1 | |
| *Carex triangularis|STARR|B739|TEX|spm00001344* | Non-Himalayan | 0 | 1 | | 0 | 1 | |
| *Carex trichocarpa|STARR|B726|DEL|spm00001331* | Non-Himalayan | 0 | 1 | | 0 | 1 | |
| *Carex tricolor|JIMENEZMEJIAS||BUL|spm00003600* | Non-Himalayan | 0 | 1 | | 0 | 1 | |
| *Carex trinervis|LUCENO|42E10NPJM|SPA|spm00003778* | Non-Himalayan | 0 | 1 | | 0 | 1 | |
| *Carex triquetra|STARR|B1193|CAL|spm00001800* | Non-Himalayan | 0 | 1 | | 0 | 1 | |
| *Carex trisperma|STARR|B729|MIC|spm00001334* | Non-Himalayan | 0 | 1 | | 0 | 1 | |
| *Carex tristachya|XIAOFENG|NA|CHS|spm00000132* | Non-Himalayan | 0 | 1 | | 0 | 1 | |
| *Carex tristis|JIMENEZMEJIAS|NA|IRN|spm00000599* | Non-Himalayan | 0 | 1 | | 0 | 1 | |
| *Carex troodi|JIMENEZMEJIAS||CYP|spm00004356* | Non-Himalayan | 0 | 1 | | 0 | 1 | |
| *Carex tsushimensis|SANGTAE|E0541|KOR?|spm00000353* | Non-Himalayan | 0 | 1 | | 0 | 1 | |
| *Carex tuberculata|REZNICEK|NA|MXC|spm00000300* | Non-Himalayan | 0 | 1 | | 0 | 1 | |
| *Carex tuckermanii|STARR|B740|MIC|spm00001345* | Non-Himalayan | 0 | 1 | | 0 | 1 | |
| *Carex tumulicola|STARR|B733|CAL|spm00001338* | Non-Himalayan | 0 | 1 | | 0 | 1 | |
| *Carex tunimanensis|REZNICEK|NA|MXT|spm00000303* | Non-Himalayan | 0 | 1 | | 0 | 1 | |
| *Carex turbinata|STARR|B1270|ARI|spm00001877* | Non-Himalayan | 0 | 1 | | 0 | 1 | |
| *Carex turgescens|STARR|B839|MSI|spm00001442* | Non-Himalayan | 0 | 1 | | 0 | 1 | |
| *Carex turkestanica|JIMENEZMEJIAS|NA|KGZ|spm00003476* | Both | 1 | 1 | | 1 | 1 | |
| *Carex typhina|STARR|B725|LOU|spm00001330* | Non-Himalayan | 0 | 1 | | 0 | 1 | |
| *Carex uhligii|STARR_FORD|STA_54|NAT|spm00005205* | Non-Himalayan | 0 | 1 | | 0 | 1 | |
| *Carex ulobasis|HIPP|NA|KOR|spm00000003* | Non-Himalayan | 0 | 1 | | 0 | 1 | |
| *Carex umbellata|STARR|B771|DEL|spm00001376* | Non-Himalayan | 0 | 1 | | 0 | 1 | |
| *Carex umbricola|STARR_FORD|STA_3||spm00005220* | Non-Himalayan | 0 | 1 | | 0 | 1 | |
| *Carex umbrosa|LUCENO|NA|BUL|spm00000537* | Non-Himalayan | 0 | 1 | | 0 | 1 | |
| *Carex uncinata|STARR_FORD||NZN|spm00005112* | Non-Himalayan | 0 | 1 | | 0 | 1 | |
| *Carex uncinioides|JIMENEZMEJIAS||CHT|spm00003409* | Both | 1 | 1 | | 1 | 1 | |
| *Carex unilateralis|STARR|B985|WAS|spm00001592* | Non-Himalayan | 0 | 1 | | 0 | 1 | |
| *Carex ursina|STARR|B1368|YUK|spm00001975* | Non-Himalayan | 0 | 1 | | 0 | 1 | |
| *Carex ussuriensis|LUCENO|NA|CHS|spm00000533* | Non-Himalayan | 0 | 1 | | 0 | 1 | |
| *Carex utriculata|STARR|B774|ARK|spm00001379* | Non-Himalayan | 0 | 1 | | 0 | 1 | |
| *Carex vacillans|STARR|B1282|MAI|spm00001889* | Non-Himalayan | 0 | 1 | | 0 | 1 | |
| *Carex vaginosa|JIMENEZMEJIAS||CHT|spm00003410* | Both | 1 | 1 | | 1 | 0 | |
| *Carex valbrayi|HIPP|NA|MDG|spm00002204* | Non-Himalayan | 0 | 1 | | 0 | 1 | |
| *Carex vallicola|STARR|B1379|BRC|spm00001986* | Non-Himalayan | 0 | 1 | | 0 | 1 | |
| *Carex vallispulchrae|LUCENO|NA|AGS|spm00000530* | Non-Himalayan | 0 | 1 | | 0 | 1 | |
| *Carex vallisrosetto|GEHRKE|NA|UGA|spm00000244* | Non-Himalayan | 0 | 1 | | 0 | 1 | |
| *Carex venusta|STARR|B767|MSI|spm00001372* | Non-Himalayan | 0 | 1 | | 0 | 1 | |
| *Carex vernacula|STARR_FORD|STA_882|CAL|spm00005382* | Non-Himalayan | 0 | 1 | | 0 | 1 | |
| *Carex verrucosa|STARR|B768|FLA|spm00001373* | Non-Himalayan | 0 | 1 | | 0 | 1 | |
| *Carex vesicaria|STARR|B755|DEL|spm00001360* | Non-Himalayan | 0 | 1 | | 0 | 1 | |
| *Carex vestita|STARR|B758|DEL|spm00001363* | Non-Himalayan | 0 | 1 | | 0 | 1 | |
| *Carex vexans|STARR|B761|FLA|spm00001366* | Non-Himalayan | 0 | 1 | | 0 | 1 | |
| *Carex vidua|JIMENEZMEJIAS||CHC|spm00003411* | Both | 1 | 1 | | 1 | 1 | |
| *Carex virescens|STARR|B751|ALA|spm00001356* | Non-Himalayan | 0 | 1 | | 0 | 1 | |
| *Carex viridistellata|STARR|B1411||spm00002018* | Non-Himalayan | 0 | 1 | | 0 | 1 | |
| *Carex viridula|JIMENEZMEJIAS|NA|KGZ|spm00003481* | Non-Himalayan | 0 | 1 | | 0 | 1 | |
| *Carex vixdentata|JIMENEZMEJIAS||AGE|spm00004366* | Non-Himalayan | 0 | 1 | | 0 | 1 | |
| *Carex vulpinaris|JIMENEZMEJIAS|NA|AFG|spm00003473* | Both | 1 | 1 | | 1 | 0 | |
| *Carex vulpinoidea|STARR|B746|CAL|spm00001351* | Non-Himalayan | 0 | 1 | | 0 | 1 | |
| *Carex wahlenbergiana|HIPP|NA|REU|spm00002201* | Non-Himalayan | 0 | 1 | | 0 | 1 | |
| *Carex wallichiana|PAK|183066* | Both | 1 | 1 | | 1 | 0 | |
| *Carex whitneyi|STARR|B747|CAL|spm00001352* | Non-Himalayan | 0 | 1 | | 0 | 1 | |
| *Carex wiegandii|STARR|B748|MAI|spm00001353* | Non-Himalayan | 0 | 1 | | 0 | 1 | |
| *Carex willdenowii|STARR|B003|KTY|spm00000624* | Non-Himalayan | 0 | 1 | | 0 | 1 | |
| *Carex williamsii|STARR|B1362|YUK|spm00001969* | Non-Himalayan | 0 | 1 | | 0 | 1 | |
| *Carex woodii|STARR|B1183|IOW|spm00001790* | Non-Himalayan | 0 | 1 | | 0 | 1 | |
| *Carex wootonii|STARR|B1206|ARI|spm00001813* | Non-Himalayan | 0 | 1 | | 0 | 1 | |
| *Carex xalapensis|REZNICEK|NA|MXC|spm00000304* | Non-Himalayan | 0 | 1 | | 0 | 1 | |
| *Carex xerantica|STARR|B1306|ONT|spm00001913* | Non-Himalayan | 0 | 1 | | 0 | 1 | |
| *Carex yadongensis|CHT|E00177570* | Non-Himalayan | 0 | 1 | | 1 | 0 | |
| *Carex yandangshanica|XIAOFENG|NA|CHS|spm00000138* | Non-Himalayan | 0 | 1 | | 0 | 1 | |
| *Carex zikae|STARR|B966|WAS|spm00001573* | Non-Himalayan | 0 | 1 | | 0 | 1 | |
| *Carex zotovii|JIMENEZMEJIAS|||spm00004411* | Non-Himalayan | 0 | 1 | | 0 | 1 | |
| *Carex zuluensis|LUCENO|NA|NAT|spm00000580* | Non-Himalayan | 0 | 1 | | 0 | 1 | |

*H=Himalayan

*N=Non-Himalayan
